# **Molecular and cellular determinants of motor asymmetry in zebrafish**

Eric J. Horstick<sup>1\*</sup>, Yared Bayleyen<sup>1</sup> and Harold A. Burgess<sup>1\*</sup>

<sup>1</sup> Division of Developmental Biology, *Eunice Kennedy Shriver* National Institute of Child Health and Human Development, Bethesda, MD 20892, USA

\* Correspondence: [eric.horstick@nih.gov](mailto:eric.horstick@nih.gov), [burgessha@mail.nih.gov](mailto:burgessha@mail.nih.gov) (lead); 301-402-6018

*Keywords:* motor asymmetry, handedness, lateralized behavior, habenula, posterior tuberculum, *epb4115*, *mind bomb*, *notch*, *mib1*, zebrafish

## 1 **Abstract**

2

3 Asymmetries in motor behavior, such as human hand preference, are observed throughout bilateria.  
4 However, neural substrates and developmental signaling pathways that impose underlying functional  
5 lateralization on a broadly symmetric nervous system are unknown. Here we report that in the absence  
6 of over-riding visual information, zebrafish larvae show intrinsic lateralized motor behavior that is  
7 mediated by a cluster of 60 posterior tuberculum (PT) neurons in the forebrain. PT neurons impose  
8 motor bias via a projection through the epithalamic commissure to the habenula. Acquisition of  
9 left/right identity is disrupted by heterozygous mutations in *mosaic eyes* and *mindbomb*, genes that  
10 regulate Notch signaling. These results define the neuronal substrate for motor asymmetry in a  
11 vertebrate and support the idea that developmental pathways that establish visceral asymmetries also  
12 govern acquisition of left/right identity.

13

14

## 15 **Introduction**

16

17 In many bilaterian organisms the nervous system shows striking structural and functional lateralization,  
18 and many species show prominent asymmetric motor behaviors such as hand or paw preference  
19 (Rogers, 2009). However, attempts to link neuroanatomic and motor asymmetries have yielded  
20 contradictory and inconclusive results in humans (Good et al., 2001; Guadalupe et al., 2014; Sun et al.,  
21 2012). In other species, despite correlations between asymmetric properties of the nervous system and  
22 lateralized behavior, causal relationships have not been established (Davison et al., 2009; Gutierrez-  
23 Ibanez et al., 2011; Jozet-Alves et al., 2012; Lee et al., 2017). In the absence of a compelling neuronal

24 basis, it has been difficult to resolve molecular determinants that drive the development of lateralized  
25 behavior.

26

27 Research to date has produced limited insight into molecular mechanisms that establish motor  
28 asymmetries. Consistent with early theories that outlined a role for single genes of large effect, twin  
29 studies on the heritability of handedness in humans revealed an important genetic component (Annett,  
30 1972; McManus, 1985; Medland et al., 2006). However, genome-wide genetic studies failed to uncover  
31 loci with large contributions (Armour et al., 2014; Eriksson et al., 2010; Somers et al., 2015).

32 Behavioral hand-preference is established as early as 10 weeks of gestation in humans and left/right  
33 asymmetries in gene expression within the spinal cord have been identified at this stage, suggesting a  
34 role for genes that pattern the nervous system (Hepper et al., 1998; Ocklenburg et al., 2017).

35 Abnormalities in neuroanatomical asymmetry and handedness are associated with schizophrenia and  
36 other neurodevelopmental disorders, however without knowledge of the underlying neuroanatomical  
37 substrates or developmental pathways these findings are difficult to interpret (Dean et al., 2016;  
38 Markou et al., 2017; Sommer et al., 2001).

39

40 In the absence of a clear structural basis for a vertebrate motor asymmetry, many studies have instead  
41 focused on molecular genetic pathways that govern the development of brain asymmetries. In  
42 particular, work in zebrafish has outlined molecular genetic pathways that govern asymmetric  
43 morphogenesis and gene expression within the dorsal diencephalon. In zebrafish, as in many other  
44 vertebrates, the habenula shows a pronounced hemispheric asymmetry with well characterized  
45 differences in the size, composition and connectivity of subnuclei on the left and right sides (Aizawa et  
46 al., 2007, 2005; Amo et al., 2010; Concha et al., 2000; Gamse et al., 2005). Moreover, functional  
47 differences between hemispheres are also apparent, with olfactory cues preferentially activating the

48 right habenula and visual stimuli driving responses in the left habenula (Cheng et al., 2017; Dreosti et  
49 al., 2014; Krishnan et al., 2014; Zhang et al., 2017). Behaviorally, the habenula in fish has been  
50 implicated in social conflict, anxiety and avoidance-learning (Amo et al., 2014; Chou et al., 2016;  
51 Facchin et al., 2015; Lupton et al., 2017) and the left-habenula in specifically in attenuating fear and  
52 driving light-preference behavior (Duboue et al., 2017). However, to date, assays reporting individual  
53 lateralized motor behavior in zebrafish have proven to difficult to reproduce, precluding efforts to  
54 resolve underlying asymmetries in brain structure (Barth et al., 2005; Facchin et al., 2009).

55

56 Here we report that individual larval zebrafish show a consistent motor asymmetry across multiple  
57 behavioral assays when tested in the absence of visual stimuli. Motor identity is maintained by a cluster  
58 of 60 neurons in the rostral lobe of the posterior tuberculum that project to the habenula nuclei, ablation  
59 of which also degrades motor bias. Finally, we demonstrate that lateralized behavior is disrupted by  
60 haploinsufficient mutations in genes that regulate Notch signaling, supporting the idea that the same  
61 pathway that establishes visceral asymmetries during development also governs acquisition of  
62 individual left/right motor identity.

63

## 64 **Results**

65

66 *Larval zebrafish show persistent individual lateralized behavior in locomotor trajectories*

67

68 After loss of illumination, 6 days post-fertilization (dpf) larval zebrafish initiate a circular swimming  
69 behavior in which they repeatedly perform same-direction turn maneuvers in a restricted spatial area  
70 (Figure 1A)(Horstick et al., 2017). Same-direction turn movements were sustained in individual larvae  
71 for two minutes (Figure 1B), however across the population there was no net tendency for larvae to



72 preferentially circle to the left or right (mean Net Turn Angle (NTA) =  $-60.8 \pm 84.2$ , one-sample t-test  
73 against 0,  $p=0.24$  ; Figure S1A). However, we asked whether individual larvae show lateralized  
74 behavior — preferentially swimming in a left or right direction — or randomly select a circling  
75 direction on each event. We therefore probed individuals with a series of four light-off trials, each  
76 separated by several minutes of illumination. Larvae that circled in a rightward direction on the first  
77 trial, showed a significant tendency to circle rightward on subsequent trials, and similarly, left-circling  
78 larvae continued to show a leftward bias (repeated measures ANOVA, main effect of trial 1 direction  
79  $F_{(1,65)}=22.20$ ,  $p<0.001$  ; Figure 1C). Lateralized behavior was not observed when larvae were tested  
80 under constant illumination, as groups initially classified as left/right based on the first trial did not  
81 show differences in mean direction on subsequent trials ( $F_{(1,61)}=1.08$ ,  $p=0.30$  ; Figure 1D). Directional  
82 bias on dark trials manifest as a 69.6% probability for larvae to circle in the same direction as on the  
83 first trial (match index,  $p < 0.0004$  compared to 50% probability ; Figure 1E). Circular swimming is  
84 primarily driven by routine-turn maneuvers (Horstick et al., 2017). We therefore used high-speed video  
85 recordings and kinematic analysis to directly measure routine-turn direction across a series of four light  
86 off trials (Figure 1F). Again, we noted that turn direction on trials 2-4 was significantly correlated with  
87 turn direction on the first trial (Figure S1B). Next, we calculated the percentage of routine-turns made  
88 in a rightward direction on each trial, then used the mean of the four trials to represent each larva's  
89 direction preference. In the dark, the distribution of direction preferences strongly deviated from the  
90 expected distribution: 41% of larvae (37/89) produced fewer than than 24% or greater than 76%  
91 rightward turns, whereas if turn-direction was random on each trial, only 10% of larvae would have  
92 shown this level of bias (Monte Carlo simulations,  $p < 0.0001$  ; Figure 1G). In contrast, under constant  
93 illumination the distribution of routine-turn direction bias was similar to the expected distribution  
94 ( $p=0.119$  ; Figure 1H). These results reveal that zebrafish larvae raised in the same environment

95 stochastically acquire a left/right directional bias in motor behavior that is manifest when tested under  
96 dark conditions.

97

98 A form of unstable lateralized eye-use behavior has been reported in zebrafish, with individuals  
99 switching eye-preference over several minutes (Andrew et al., 2009). In contrast we found that turn-  
100 bias during dark-induced circling behavior was sustained for at least 45 min (Figure S1C). Next, we  
101 tested individuals at 6 dpf to establish their left/right motor identity, then returned them to an incubator  
102 overnight. The next day, we recorded responses to a second set of four light-off stimuli. Turn direction  
103 bias for individual larvae was significantly correlated between days (Spearman  $\rho=0.58$ ,  $p=0.0009$  ;  
104 Figure 1I-J, S1D) and also sustained in larvae that were raised for 4 days between tests ( $\rho=0.39$ ,  
105  $p=0.0003$  ; Figure 1J, S1F). Decomposing turn bias into its magnitude and direction components  
106 revealed that overall left/right direction preference was maintained (d6 to d7, Mann-Whitney U  
107  $p=0.012$  ; d6 to d10,  $p=0.00039$  ; Figure 1J) although the strength of the preference was not correlated  
108 across days (d6 to d7,  $\rho=-0.02$ ,  $p=0.9$  ; d6 to d10,  $\rho=0.054$ ,  $p=0.7$  ; Figure S1E,G). Thus left/right  
109 motor identity is sustained in individual larvae for several days. In birds stable perceptual asymmetries  
110 are conferred by visual experience during embryonic development (Rogers, 1982). In contrast, dark-  
111 reared zebrafish larvae showed normal lateralized behavior, excluding an instructive role for visual  
112 experience in the acquisition of motor identity (Figure S1H). Together, these data provide compelling  
113 evidence that zebrafish larvae show a robust motor asymmetry, manifest as persistent individual  
114 differences in the direction of circling behavior after loss of illumination. Behavioral asymmetry in  
115 zebrafish is of moderate strength: larvae initiate movement in their preferred direction on around 70%  
116 of trials. Similar numbers of larvae are left and right-biased, with no apparent population-level  
117 asymmetry.

118

119 Next we asked whether motor bias is also present in responses to other stimuli. Zebrafish show positive  
120 phototaxis, and select and swim toward one of two simultaneously illuminated regions (Burgess et al.,  
121 2010). We first classified larvae as left or right biased during dark-induced circular swimming, then  
122 used a closed-loop system to present freely swimming larvae with two identical target spots on the left  
123 and right (Figure 2A,B). Target choice was positively correlated with circular swimming direction  
124 (Figure 2C). We also tested whether lateralized motor behavior occurred during responses to a non-  
125 visual stimulus. In zebrafish, intense auditory stimuli elicit escape responses that are initiated with a  
126 rapid bend to either the left or right, raising the possibility that startle direction might show a motor  
127 asymmetry. We again pre-classified larvae using dark-induced circular swimming, then measured  
128 startle direction. Under constant illumination, escape response direction showed little or no correlation  
129 with circular swim direction (Figure 2D, yellow background). However auditory stimuli that were  
130 presented in the dark evoked startle responses whose direction showed a significant match to the  
131 direction of circular swimming (Figure 2D, grey background). Thus, motor bias was apparent in three  
132 different assays, consistent with individual larvae having an intrinsic left/right motor identity.

133

134 In all three assays, motor asymmetry was primarily manifest in the dark, suggesting that that visual  
135 cues over-ride intrinsic bias. We tested this idea using *ato7* mutants which completely lack projections  
136 from the retina to the brain. Even without retinal signaling, zebrafish respond to changes in whole-field  
137 illumination via deep brain photoreceptors (Fernandes et al., 2012; Horstick et al., 2017; Kokel et al.,  
138 2010). Thus on trials 2-4 of the dark-induced circling assay, both *ato7* mutants and siblings  
139 demonstrated a significant tendency to swim in the same direction as in trial 1 (Figure 2E, grey bars).  
140 However, unlike wildtype sibling larvae, *ato7* mutants also showed a weak but significant motor  
141 asymmetry under illuminated conditions ( $p=0.003$  ; Figure 2E, yellow bars). Next, we used acute  
142 unilateral enucleation to control the source of visual information. After acute unilateral enucleation,

143 circling was performed in the direction contralateral to the intact eye on all four trials (Figure 2F).  
144 Together, these results support the idea that visual information, when present, predominates over  
145 intrinsic motor asymmetry.

146

147 *Neurons in the posterior tuberculum maintain left/right motor identity*

148

149 We next set out to identify the underlying neuronal substrates for left/right bias. Whereas the parapineal  
150 and habenula show consistent population-wise anatomical asymmetries, no brain regions are known in  
151 zebrafish to have stochastic hemispheric differences in size or function that would be consistent with  
152 individual left/right motor bias (Concha et al., 2000; Gamse et al., 2003). We therefore performed a  
153 circuit-breaking screen to identify neuronal substrates, crossing Gal4 lines that label distinct brain  
154 structures to a UAS:epNTR-TagRFP reporter for cell-specific ablation using nitroreductase (Figure 3A)  
155 (Horstick et al., 2014; Pisharath et al., 2007). After lesioning the labeled population of neurons in each  
156 line, we then tested whether individual motor bias remained. Larvae showed a decrease in motor bias  
157 after ablation of neurons in two Gal4 lines: *y279* and *y375* (Figure 3B). Reduced motor bias was  
158 specific, as ablation did not affect the total amount of turning behavior or baseline locomotion (Figure  
159 S2A). Finally, the chemogenetic ablation protocol itself did not disrupt motor bias as ablation of  
160 neurons in orthopedia driver line *otpb.A:Gal4* had no effect (Figure 3B). Thus the *y279* and *y375* Gal4  
161 lines label neurons that are critical for individual motor bias.

162

163 *y279* and *y375* each express Gal4 in neurons distributed in multiple brain regions (Figure 3C,D). We  
164 reasoned that clusters labeled by both lines would be strong candidates for driving lateralized behavior.  
165 Because both lines express the same reporter, we could not directly identify co-labeled neurons, but  
166 instead compared co-registered whole-brain images of each line (Marquart et al., 2015). Salient virtual

167 co-expression was present in a bilateral cluster of neurons in the posterior tuberculum (PT) (Figure 3E,  
168 S2B-E). Cell counts established that each PT hemisphere comprised  $28.3 \pm 7.2$   $y279^+$  cells (mean  $\pm$   
169 standard deviation, N=28 larvae, Figure 3F), but did not reveal differences between hemispheres in left  
170 and right biased larvae (Figure S2F). We assessed whether the PT clusters were required for left/right  
171 bias by using focal laser ablation of  $y279$  neurons. As a control we also ablated the caudal  
172 hypothalamus (Hc) which is strongly labeled in  $y279$ . Ablation of the Hc had no effect whereas  
173 bilateral ablation of the rostral PT cluster strongly reduced motor bias, consistent with a loss of  
174 left/right identity (Figure 3G, S3A). Conversely, after unilateral PT ablations 76% of larvae (38/50)  
175 circled in the direction ipsilateral to the intact PT during dark trials, with no effect during baseline  
176 illumination (Figure 3H, S3B-C). The posterior tuberculum is a ventral region of the diencephalon that  
177 includes identified classes of dopaminergic (DA) neurons (Rink and Guo, 2004; Tay et al., 2011).  
178 However, the cluster of PT neurons labeled in  $y279$  and  $y375$  is situated rostral and dorsal to PT DA  
179 neurons (Figure S2B). Moreover *otpa* mutants, which lack key classes of DA neurons, and *otpb.A:Gal4*  
180 ablations retained robust left/right bias (Figures 3B ; S3D). It is therefore unlikely that PT  
181 dopaminergic function contributes to motor asymmetry. These results confirm that a cluster of neurons  
182 in a rostral lobe of the posterior tuberculum impose left/right bias on motor responses in zebrafish.

183

184 *PT neurons show persistent activity after loss of illumination*

185

186 We next examined whether PT neurons are active after loss of illumination by imaging changes in  
187 GCaMP6s fluorescence in  $y279$ -*Gal4*, *UAS:GCaMP6s* larvae. Because we previously found that photic  
188 stimulation acutely terminates localized circling behavior (Horstick et al., 2017), we used an infra-red  
189 laser for two-photon excitation of GCaMP6s during these recordings. We attempted to simultaneously  
190 record tail movements, but found that persistent motor responses to the loss of illumination were not

191 apparent in immobilized larvae. Nevertheless we reasoned that even if the motor behavior was not  
192 preserved, PT neurons might still respond to loss of illumination. Indeed, 16.2% of PT neurons (37/228  
193 from 6 larvae) responded to the light off stimulus (Figure 4A-B). PT neuron activity peaked shortly  
194 after loss of illumination and remained elevated during the 57s recording interval, consistent with the  
195 time-frame of circling behavior (Figure 4C). An additional 3.9% of PT neurons (9/228) were active  
196 upon the restoration of illumination. However no significant correlations were observed between the  
197 left/right identity of individual larvae and peak GCaMP activation or position of light OFF responsive  
198 neurons within the PT (Figure 4D,E). These results establish that a subset of PT neurons fire in  
199 response to changes in illumination and remain active on a time scale consistent with the duration of  
200 motor asymmetry during dark-induced circling behavior.

201

202 *Projections from the PT to habenula are essential for motor bias*

203

204 The epithalamic commissure (Ec) that runs between the habenula hemispheres is labeled in *y279-Gal4*,  
205 *UAS:Kaede* larvae (Figure 5A). As *y279* also labels neurons in the habenula — particularly in the left  
206 habenula — we initially suspected that this commissure was formed by *y279* habenula neurons.  
207 However when performing confocal scans to verify laser ablations, we noticed that fluorescently  
208 labeled fibers were absent in bilateral PT lesioned larvae, raising the possibility that commissural fibers  
209 originate in the PT (Figure 5B). To test this, we unilaterally photoconverted Kaede in the PT in *y279-*  
210 *Gal4, UAS:Kaede* larvae. Photoconverted Kaede labeled neurites that emerged dorsally from each PT  
211 hemisphere and projected to the ipsilateral habenula. Within the habenula these fibers turned and  
212 crossed to the contralateral side through the epithalamic commissure (Figure 5C,D). PT projections  
213 terminated in the neuropil region of both habenula hemispheres. No salient differences in the PT-  
214 habenula projection were observed for left or right-biased larvae, however this observation raised the

215 possibility that the PT controls motor bias via signaling to the habenula. We tested this by laser ablation  
216 of  $\gamma 279$  habenula neurons (Figure S3A). Bilateral ablation of  $\gamma 279$  habenula neurons abolished  
217 left/right bias without affecting total turning (Figure 5E-F). Moreover after unilateral habenula ablation  
218 motor responses were strongly lateralized during dark-induced circling behavior, without inducing  
219 motor bias under baseline illumination (Figures 5G ; S3C). In contrast to PT lesions, total turning  
220 behavior did not increase after unilateral habenula ablation (Figure S3E). Intriguingly, selective lesion  
221 of the epithalamic commissure also induced a strong motor asymmetry that was similar to ablation of  
222 the right-habenula, such that larvae became left-biased only under dark conditions (Figure 5G,H,  
223 S3C,F). Together, the loss of motor bias after bilateral ablation of either the PT or habenula, induction  
224 of left/right lateralized behavior after unilateral ablations and presence of a direct connection between  
225 these areas, argues that the PT-habenula pathway imposes left/right bias on motor responses.

226

227 *Haploinsufficient notch pathway mutations disrupt lateralized behavior*

228

229 Many species, including zebrafish, show a stereotyped asymmetric development of specific brain  
230 nuclei and placement of viscera. Genes involved in this process have been relatively well characterized  
231 (Concha et al., 2000; Lopes et al., 2010; Yan et al., 1999). However much less is known about genetic  
232 pathways that lead to the stochastic acquisition of left or right motor asymmetry. During the course of  
233 our studies, we isolated a background mutation ( $\gamma 606$ ) in our wildtype stock that weakened motor bias  
234 during circling behavior. In affected clutches, 25% of embryos showed a 'curly-up' phenotype that  
235 severely effected tail morphology and precluded behavioral testing (Figure 6A). We speculated that the  
236 morphological abnormality represented a homozygous phenotype, with loss of motor asymmetry  
237 present in morphologically normal heterozygous larvae (Figure 6B). RNAseq-based bulk segregant  
238 mapping linked the mutation to a six Mbp interval on chromosome 9 and revealed a 7.7-fold reduction

239 in the expression of the gene *epb4115* in this interval in *y606* mutants compared to siblings (Figure  
240 S4A-B) (Miller et al., 2013). No RNAseq reads mapped to the first two exons, and we were not able to  
241 amplify these exons from mutants using genomic PCR (Figure S4C). Consistent with this, genomic  
242 PCR revealed a 4.4 kb deletion that excises exons 1 and 2 of *epb4115*, eliminating the transcription and  
243 translation start sites (Figure S4D). *Epb4115* is the mutated gene in the *mosaic eyes* (*moe<sup>b476</sup>*) mutant  
244 that shows a similar curly-up phenotype (Jensen et al., 2001) and *moe<sup>b476</sup>* failed to complement *y606*,  
245 confirming that *y606* is a new allele of *mosaic eyes*.

246

247 We incrossed *moe<sup>y606</sup>* heterozygous adults and tested morphologically normal siblings of curly-up  
248 mutants in the dark-induced circling assay, then performed post-hoc genotyping to distinguish wildtype  
249 and heterozygous larvae. Wildtype larvae showed normal motor asymmetry, however heterozygous  
250 *moe<sup>y606</sup>* larvae showed a significant reduction in left/right-bias (Figure 6C). Other motor parameters and  
251 asymmetric development of the epithalamus and viscera were unaffected in heterozygotes (Figure  
252 6E,F). To corroborate these findings we used *moe<sup>b476</sup>*, an independent allele that we confirmed  
253 eliminates the entire *epb4115* gene (Figure S5A-C). Heterozygous mutations in *moe<sup>b476</sup>* also disrupted  
254 motor bias during circling behavior (Figure 6D). These results demonstrate that acquisition of left/right  
255 identity in zebrafish requires two functional alleles of *epb4115* in zebrafish.

256

257 *Epb4115* regulates the timing of neurogenesis, interacting with proteins in the *Notch* signaling pathway  
258 (Matsuda et al., 2016; Ohata et al., 2011). Notch regulates *Nodal*, the central gene that drives the  
259 development of molecular and anatomical left-right asymmetry (Krebs et al., 2003; Raya et al., 2003).  
260 We therefore reasoned that other heterozygous mutations in Notch signaling proteins might perturb  
261 left/right bias and tested larvae with heterozygous mutations in *mindbomb* (*mib*), an E3 ubiquitin ligase  
262 that is essential for notch signaling (Itoh et al., 2003). Indeed, *mib* heterozygotes showed a severe loss



263 of left/right-bias during dark-induced circling (Figure 6G) without perturbing the total amount of  
264 turning (Figure 6H). Together, these findings reveal that acquisition of left/right motor identity is  
265 disrupted by mutations in genes that regulate Notch signaling levels during embryonic development.

266

## 267 **Discussion**

268

269 Here, we reveal that in the absence of visual information, zebrafish manifest a durable left/right motor  
270 bias that is driven by neurons in the posterior tuberculum. Lateralized motor behavior occurs both  
271 during spontaneous movement, and in response to visual and auditory cues. Zebrafish do not show a  
272 population-level bias, unlike in humans where 90% of the population favor the right hand (Corballis,  
273 2003). Rather, similar to motor asymmetries in many other species, lateralized behavior is manifest as  
274 an individual bias to execute movements in a preferred direction on ~70% of trials. Left/right identity is  
275 maintained over at least several days despite handling and changes in the environment. Bilateral  
276 clusters of ~30 genetically identified neurons per hemisphere in the rostral lobe of the posterior  
277 tuberculum are essential for the expression of this motor asymmetry. This conclusion is supported by  
278 loss of lateralized behavior after chemogenetic ablation of rostral PT neurons using two transgenic  
279 Gal4 lines that have minimal overlap elsewhere in the brain, and direct laser photoablation of the PT. In  
280 addition, unilateral laser ablation of PT neurons was sufficient to create a population of fish whose  
281 response direction was heavily biased to the side of the intact PT. Critically, after rostral PT lesions,  
282 larvae continued to show persistent turning to one side after loss of illumination, but circling behavior  
283 was initiated in a random direction on each trial rather than in a preferred direction. It is therefore  
284 unlikely that the rostral PT is part of the sensory pathway that initiates dark-induced circling, but rather  
285 suggests that the PT is a locus that maintains left/right identity and imposes this bias on motor  
286 responses. Finally, neurons in the rostral PT show sustained activity after loss of illumination,

287 consistent with the duration of lateralized circling movements. Together, these findings confirm that the  
288 rostral posterior tuberculum drives lateralized behavior in zebrafish and define a specific neuronal  
289 substrate for a lateralized motor behavior in a vertebrate.

290

291 *A PT-habenula circuit directs motor asymmetry*

292

293 Our findings suggest a model in which bilateral PT-habenula units compete to strengthen, but not  
294 directly drive ipsilateral dark-induced circling behavior (Figure 7). In individual larvae, one hemisphere  
295 predominates, providing a greater drive to premotor circuits. How left/right identity is encoded in the  
296 PT-habenula unit is unclear: we did not detect differences in the number of neurons or light-off activity  
297 between hemispheres that correlated with motor bias. The strong effect of unilateral PT ablations  
298 indicate that the intact hemisphere, even if it was not previously dominant, was capable of imposing  
299 ipsilateral motor bias, suggesting that dominance is unlikely to reflect a unique quality present in only  
300 one hemisphere. However, after unilateral PT ablation, not only was dark-induced motor behavior  
301 strongly lateralized, but net turning also increased, consistent with the idea that in the absence of  
302 competition, there is greater drive biasing ipsilateral premotor circuits. Although we are not aware of  
303 evidence for a direct connection between PT clusters we found that PT neurons project to and  
304 commissurally within the habenula, concordant with a previous report (Hendricks and Jesuthasan,  
305 2007). Thus competition between PT clusters may take place within the habenula. In keeping with this  
306 idea, ablation of *y279* habenula neurons disrupted lateralized responses similar to PT ablation.  
307 However, ablation of the habenula commissure yielded a population of larvae with left-biased  
308 responses, similar to ablation of either right habenula or PT, possibly suggesting that the left habenula  
309 predominates in the absence of communication. Thus, although our findings do not resolve the precise

310 mechanism by which the PT directs motor asymmetry, they demonstrate that a PT-habenula pathway is  
311 an essential substrate for lateralized behavior in zebrafish.

312

313 *Genetic control of individual left/right identity*

314

315 The last two decades has produced significant progress in understanding the morphogenetic processes  
316 that lead to consistent left-right asymmetries within the nervous system (Roberson and Halpern, 2018).  
317 In contrast, much less is known about how stochastic individual patterns of left/right identity are  
318 established. In birds, asymmetric sensory experience during a critical period in early development  
319 imprints hemispheric dominance for visual feature processing (Koshihara et al., 2002; Rogers, 1982). In  
320 contrast, we found that dark-reared larvae and *atoh7* mutants which lack central projections of retinal  
321 ganglion cells at all stages maintained individual motor lateralization indicating that neither  
322 spontaneous retinal activity nor asymmetric visual experience are required for individual bias to  
323 emerge. Further, as in mice and *Drosophila*, selective breeding experiments excluded the possibility  
324 that a heritable factor dictates left/right preference (Figure S6)(Buchanan et al., 2015; Collins, 1969).  
325 Most likely, directional bias is stochastically determined during embryogenesis by either a specific  
326 symmetry breaking event or by natural variability in development. While the nature of this process is  
327 not yet known, recent genome-wide association studies have provided tantalizing hints that molecular  
328 pathways involved in the development of visceral asymmetries also contribute to the establishment of  
329 human handedness (Brandler et al., 2013). Consistent with this idea, we found that left/right motor  
330 identity was disrupted by heterozygous mutations in *epb41l5*, a gene required for left-right patterning  
331 in mice (Lee et al., 2010). *Epb41l5* is a membrane adapter protein (Matsuda et al., 2016; Ohata et al.,  
332 2011) that interacts with *mind-bomb*, a ubiquitin-ligase required for Notch signaling during  
333 neurogenesis (Itoh et al., 2003). Accordingly we found that heterozygous mutations in *mind-bomb*, a

334 ubiquitin-ligase required for notch signaling, also disrupted lateralized behavior. Surprisingly,  
335 behavioral changes were seen in haploinsufficient mutants suggesting that acquisition of left/right  
336 identity is highly sensitive to notch signaling levels. Indeed in mice, haploinsufficient mutations of the  
337 notch ligand *delta-like 1* lead to a reduction in dopaminergic neuron differentiation, and in zebrafish  
338 manipulations that augment or disrupt notch signaling during habenula neurogenesis can shift the  
339 production of lateral or medial neurons and thereby isomerize the habenulae (Aizawa et al., 2007;  
340 Trujillo-Paredes et al., 2016). Intriguingly, *notch1a* has a similar temporal profile of expression in the  
341 developing PT raising the possibility that heterochronic neurogenesis of PT neuron subtypes is  
342 involved in acquisition of left/right identity (Mueller and Wullmann, 2005). Thus although we did not  
343 observe changes in the number of *y279* expressing neurons in the left or right PT hemisphere in  
344 *epb4115* heterozygous mutants (Figure S7), future studies may reveal alterations in the differentiation  
345 of neuronal cell types associated with loss of left/right identity.

346

347 *Neural correlates of motor asymmetries*

348

349 Cerebral asymmetries have been proposed to increase information processing power through  
350 hemispheric specialization (Vallortigara and Rogers, 2005), or, to reflect space constraints in the brain  
351 that necessitate partitioning processing functions between hemispheres (Barneoud and Van der Loos,  
352 1993). Indeed, the left and right habenula nuclei in zebrafish are activated by different sensory  
353 modalities and have separable roles in behavior (Cheng et al., 2017; Dreosti et al., 2014; Duboue et al.,  
354 2017; Krishnan et al., 2014; Zhang et al., 2017), and in *C elegans* and *Drosophila* brain asymmetries  
355 have been linked to sensory processing and memory formation respectively (Pascual et al., 2004;  
356 Pierce-Shimomura et al., 2001; Wes and Bargmann, 2001). Asymmetries in sensory processing areas in  
357 birds are correlated with lateralized control of behavior (Rogers, 1990). Similarly, it seems natural to

358 postulate that asymmetric structural or functional properties of the nervous system also underlie motor  
359 asymmetries. However, evidence for this idea is surprisingly elusive: motor lateralization has only  
360 rarely been correlated with an underlying cerebral asymmetry, and causal relationships have yet to be  
361 established (Davison et al., 2009; Gutierrez-Ibanez et al., 2011; Jozet-Alves et al., 2012; Lee et al.,  
362 2017). The strongest relationship to date has been described in the pond snail *Lymnaea stagnalis* where  
363 the direction of coiling behavior by males during mating almost completely matches the side on which  
364 two central ganglia are fused (Davison et al., 2009).

365

366 Even less clear is the nature of the ethological advantage conferred by motor asymmetries. An enduring  
367 argument is that the hemispheres of an ideal perfectly symmetrical nervous system can not discriminate  
368 bilaterally symmetrical sensory stimuli and would therefore reach a stalemate in selecting a left or right  
369 motor response to a non-directional cue (Webster, 1977). Intrinsic neural asymmetries may therefore  
370 facilitate motor responses to stimuli with ambivalent directional information, avoiding simultaneous  
371 initiation of left/right responses, or reactions that are delayed due to difficulty selecting a response  
372 direction. Indeed, during dark-induced circular swimming, larvae must initiate movement by  
373 contracting muscles on one side. In the light, even small asymmetries in the visual environment may  
374 over-ride innate bias, explaining why we do not observe motor asymmetry under illuminated  
375 conditions. This idea is also consistent with our finding that *atoh7* mutants, which are blind, show  
376 motor bias under both light and dark conditions; in mutants visual stimuli do not reach the brain to  
377 over-ride innate direction preference.

378

379 Motor asymmetries such as human handedness are among the most pervasive and salient forms of  
380 individual variation. Moreover, variation in motor asymmetries is linked to inter-individual differences  
381 in personality, cognitive processing and risk for neurodevelopmental disorders (Markou et al., 2017;

382 Sommer et al., 2001). Yet, attempts to understand how such motor asymmetries are stochastically  
383 generated during development, or even their structural or functional basis in the brain, have yielded  
384 limited insight. In particular, efforts to study the development and basis for human handedness have  
385 been hampered by difficulty in identifying a neural substrate, and inability to perform experimental  
386 manipulations. Our identification of a specific neuronal substrate for asymmetric motor behavior in  
387 zebrafish opens up a new model for understanding how functional lateralization emerges and is  
388 maintained in the nervous system. Moreover our data also suggests that acquisition of left/right identity  
389 is sensitive to specific levels of *Notch* pathway activity. These results therefore set the stage to uncover  
390 precisely how motor bias is established during development and is maintained by structural or  
391 functional asymmetries within the nervous system.

392

### 393 **Acknowledgements**

394

395 We thank Jennifer Sinclair for expert technical support, Dr. Katie Drerup for assistance with  
396 RNAmapper, Greg Palardy for the mib genotyping protocol and the NICHD Molecular Genomics Core  
397 for library preparation and sequencing. This work was supported by the Intramural Research Program  
398 of the *Eunice Kennedy Shriver* National Institute for Child Health and Human Development (NICHD)  
399 and utilized the high-performance computational capabilities of the Biowulf Linux cluster at the  
400 National Institutes of Health, Bethesda, MD.

401

### 402 **Author Contributions**

403

404 EJH and HAB conceived the experiments and wrote the manuscript. EJH, YB and HAB performed  
405 experiments. All authors approved the final manuscript.

406

407 **Declarations of Interests**

408

409 The authors declare no competing interests.

410

411 **Figure legends**

412

413 **Figure 1: Individual larvae show persistent motor asymmetry during dark-induced circling**  
414 **behavior.**

415

416 A. Schematic of setup for path trajectory analysis (left). Swim trajectories for single larvae during  
417 baseline illumination and immediately after the loss of light (yellow and grey backgrounds  
418 respectively). Color scale represents time (seconds). Arrowheads along path line represent orientation  
419 of larva. Scale bar 20 mm.

420

421 B. Net turn angle over 30 s intervals for larvae before and after the loss of illumination (indicated by  
422 top horizontal bars). Individuals were classified as either right (cyan, N=25) or left biased (grey, N=34)  
423 based on the first 30 s interval after the loss of illumination. \*  $p < 0.05$ , t-test between groups.

424

425 C. Net Turn Angle for larvae over four 30 s light off trials. Horizontal bars at top indicate baseline  
426 illumination (yellow) and light-off (black) periods. Open circles in the first trial (time 0) represent  
427 individual NTA for all larvae tested and were used to classify larvae as right (cyan, N=34) or left-biased  
428 (black, N=34). Subsequent points represent mean and standard deviation for left/right groups on trials  
429 2-4. \*  $p < 0.05$ , t-test between groups.

430

431 D. As for (C) during constant illumination (right, N=29 ; left, N=35).

432

433 E. Match Index during baseline illumination (yellow, N=64) and after the loss of illumination (grey,  
434 N=68). \*  $p < 0.05$ , Mann-Whitney U test and (circled) 1-sample permutation test to 0.5.

435

436 F. Visually isolated chamber for high-speed recordings that enable kinematic analysis of routine turns  
437 during circling behavior. Right: Time lapse montage over 10 s interval following loss of illumination.  
438 Color indicates time.

439

440 G-H. Histogram for percentage of turns executed in a rightward direction (mean of four 10 s trials)  
441 after loss of illumination (G, grey, N=89 larvae) or during constant illumination (H, yellow, N=39). Red  
442 line represents expected distribution from Monte Carlo simulation assuming larvae have no directional  
443 bias.

444

445 I. Rightward turn preference over 24 hour interval. Larvae were classified as right (cyan, N=14) or left  
446 (black, N=12) biased by four repeated dark recordings at 6 dpf. In this analysis, larvae with less than  
447 33% of turns in a rightward direction were classified as left-biased, and those with greater than 66%  
448 classified as right-biased. At 7 dpf % rightward turn use was measured in L/R classified groups. Dotted  
449 red lines at 50% indicates no bias.\*  $p < 0.05$  between groups.

450

451 J. Percentage of trials that had a net rightward bias for larvae tested at 7 or 10 dpf (N=30, 52  
452 respectively), after being classified as left or right-biased at 6 dpf. \*  $p < 0.05$ , Mann-Whitney U test.

453



454

455 **Figure 2: Motor asymmetry is correlated across multiple behavioral tasks**

456

457 A. Experimental paradigm: larvae were are classified as left or right biased at 6 dpf based on their  
458 circling response after loss of illumination (over 4 trials). The following day, the same larvae were  
459 tested in either a two-target phototaxis assay or acoustic startle assay.

460

461 B. Representative path trajectories of individual right (cyan) and left (grey) classified larvae  
462 (arrowhead) presented with two symmetric light spots following the loss of illumination.

463

464 C. Percent of trials on which larvae turned toward the right spot, for larvae classified at 6 dpf as left-  
465 biased (grey, N=12) and right-biased (cyan bar, N=13). Each larva performed 4 trials, with individual  
466 trials excluded if the larvae was adjacent to the edge of the arena when the phototaxis spots were  
467 presented. \*  $p < 0.05$ , Mann-Whitney U test.

468

469 D. Percentage of startle responses made in a rightward direction for larvae classified as left (grey) and  
470 right (cyan) biased. Larvae were tested either in the dark (grey background) or the light (yellow  
471 background). As acoustic stimuli elicit either short or long latency C-starts (SLC, LLC) that are  
472 mediated by different circuits, response types were analyzed separately. Red diamond indicates mean.  
473 Dark LLC responses: left N=19, right N=20. Dark SLC responses: left N=12, right N=14 ; Light LLC  
474 responses: left N=27, right N=23 ; Light SLC responses: left N=18, right N=28. \*  $p < 0.05$ , Mann-  
475 Whitney U test.

476

477 E. Match index for *atoh7* mutants and siblings during baseline illumination (sib, N=45 ; mutant, N=57 ;

478 yellow bars) and dark responses (sib, N=51 ; mutant, N=58 ; grey bars). \*  $p < 0.05$ , one-sample  
479 permutation test to 0.5.

480

481 F. Net turn angle for each of four trials after unilateral enucleation of the left (grey, N=4) or right (cyan,  
482 N=6) eye. Dotted red line shows random output. \*  $p < 0.05$  between groups.

483

484

485 **Figure 3: Neurons in the posterior tuberculum maintain left/right identity**

486

487 A. Chemogenetic ablation screen: transgenic lines with restricted Gal4 patterns were crossed to a  
488 UAS:epNTR-RFP reporter. Both epNTR-RFP+ and non-fluorescent siblings (as controls) were treated  
489 with metronidazole before testing for motor asymmetry under light and dark conditions.

490

491 B. Match index for drug treated controls (*y279* N=54 ; *y375* N=43 ; *otpbA* N=35) and following genetic  
492 ablation (*y279* N=58 ; *y375* N=37 ; *otpbA* N=46) during paired baseline (yellow) and dark (grey)  
493 responses.

494

495 C-D. Whole brain dorsal Zebrafish Brain Browser (ZBB) projections for *y279* (D), *y375* (E). Color is  
496 depth scale.

497

498 E. Computed intersect *y279* and *y375* expression patterns. Arrowhead indicates PT.

499

500 F. Dorsal confocal projection through the rostral PT in *y279-Gal4*, *UAS:Kaede* (green) crossed to  
501 *vglut2a:dsRed* (red). Scale bar 20 $\mu$ m.

502

503 G. Match index in unablated controls (N=45) and after bilateral laser ablation of the PT (N=17) and Hc  
504 (N=19) during baseline (yellow) and on dark trials (grey). \*  $p < 0.05$ , Mann-Whitney U test.

505

506 H. Net turn angle (mean on trials 1-4) for left PT hemisphere (grey, N=27) and right PT hemisphere  
507 (cyan, N=23) ablations. Hc unilateral ablations (right bars) (left hemisphere grey, N=24 ; right  
508 hemisphere cyan, N=22). \*  $p < 0.05$ , t-test.

509

510

511 **Figure 4: Neurons in the posterior tuberculum respond to changes in illumination.**

512

513 A. Raster plot of mean calcium responses (mean of 3 trials) from GCaMP6s expressing PT neurons.  
514 Color scale denotes standardized change in fluorescence intensity ( $\Delta F/F$ ). Illumination conditions as  
515 indicated on x-axis (Light ON, orange ; dark, grey). Only a subset of no response neurons are included.

516

517 B. Location of light OFF responsive neurons in the rostral PT. Scale bar indicates fluorescence ( $\Delta F/F$ )  
518 change over baseline.

519

520 C. Mean and standard error for response of light OFF (green, N=37) and light ON (purple, N=9)  
521 responsive neurons.

522

523 D. Peak change in fluorescence for neurons that respond to light OFF in the left (PTL) and right (PTR)  
524 PT for larvae classified as left (red) and right (blue) motor biased.

525

526 E. Location of light OFF responsive neurons within the PT for larvae behaviorally identified as left  
527 (red) or right (blue) biased.

528

529

530 **Figure 5: A projection from posterior tuberculum to habenula drives motor asymmetry**

531

532 A-B. 3D rendering of *y279-Gal4, UAS:Kaede* expression in the habenula at 7 dpf in intact larvae (A)  
533 and after bilateral ablation of *y279* expressing PT neurons (B). Arrow indicates epithalamic  
534 commissure (Ec) present in intact larvae that is lost after bilateral PT ablation. Scale bar 20 $\mu$ m.

535

536 C-D. Confocal projections of *y279-Gal4;UAS:Kaede* expressing larvae following unilateral focal  
537 photoconversion of Kaede in the left (C) or right (D) rostral PT. Photoconverted Kaede in the red  
538 channel is saturated to facilitate visualization of PT projections. Scale bar 20 $\mu$ m.

539

540 E. Net turn angle (mean of trials 2-4) for intact control larvae (N=47) and after bilateral ablation of  
541 *y279* expressing habenula neurons (N=22). Larvae were classified as left-biased (grey) or right-biased  
542 (cyan) based on trial 1 (T1). \*  $p < 0.05$ , t-test.

543

544 F. Total amount of turning for larvae in (E) during locomotion under baseline illumination (yellow) or  
545 dark-induced circling behavior (grey).

546

547 G. Net turn angle (mean of trials 1-4) in non-ablated controls (white, N=47) and following unilateral  
548 ablation of the left (grey, N=33), right (cyan, N=28) habenula nuclei or following laser section of the  
549 epithalamic commissure (Ec) (N=24). \*  $p < 0.05$  t-test. circled \*  $p < 0.05$ , one-sample t-test to 0.

550

551 H. Representative confocal scan showing *y279* labeled epithalamic commissure (Ec) (arrow) in a  
552 control larva (top). Following ablation commissure is absent (bottom). Scale bar 20 $\mu$ m.

553

554

555

556 **Figure 6: Left/right identity is disrupted by mutations in genes that regulate Notch signaling**

557

558 A-B. Curly-up morphology in 2 dpf *y606* mutants (A) and sibling larvae (B).

559

560 C. Net Turn Angle for *moe<sup>y606</sup>* heterozygous (left, +/-) and wildtype (right, +/+) sibling larvae over four  
561 30 s light off trials. Open circles in the first trial (time 0) represent individual NTA for all larvae tested  
562 and were used to classify larvae as right (cyan, Het N=34 ; WT N=20) or left-biased (black, Het N=27 ;  
563 WT N=20). Subsequent points represent mean for left/right groups on trials 2-4.

564

565 D. Same analysis as in (C) for *moe<sup>b476</sup>* allele showing right (cyan, Het N=11 ; WT N=15) or left-biased  
566 (black, Het N=25 ; WT N=9) larvae. \*  $p < 0.05$  between groups in C-D.

567

568 E. Absolute Net Turn Angle for *moe<sup>y606</sup>* heterozygous (N=47) and wildtype sibling (N=40) larvae  
569 averaged over 4 trials for baseline illumination (yellow bar) and light off (grey bar) trials.

570

571 F. Habenula and heart placement in wildtype sibling and *moe<sup>y606</sup>* heterozygous larvae. Left: Percentage  
572 of larvae with larger habenula hemisphere on each side (N=28, 33 for wildtype, hets). Right:

573 Percentage of embryos with heart positioned on the left, right or midline (N=28,34 for wildtype, hets).

574

575 G-H. Match index (F) and total turning (G) for wildtype sibling and *mib<sup>ta52b</sup>* heterozygous larvae

576 (N=31,27 respectively), during baseline (yellow) and dark (grey) responses. \*  $p < 0.05$ , Mann-Whitney

577 U test.

578

579

580

581 **Figure 7: Motor asymmetry in zebrafish**

582

583 A. For a right biased larva, the dominant right PT-habenula pathway imposes right motor bias by

584 modulating symmetric visual drive and suppressing the left PT-habenula pathway.

585

586 B. Competition between PT-habenula units is eliminated after unilateral ablations, strengthening motor

587 bias.

588

589 C. Asymmetric visual input after unilateral enucleation overrides PT-habenula modulation of motor

590 output.

591

592 D. Symmetric visual stimuli, after bilateral ablation of PT-habenula units eliminates motor bias leading

593 to randomized turn direction.

594

595

596 **Methods**

597

598 *Zebrafish*

599

600 Adult zebrafish (*Danio rerio*) were maintained with a Tubingen long fin strain background. All animal  
601 care and experimental procedures were approved by the NICHD animal care and use committee.  
602 Experiments were performed on larvae in the first 10 days post fertilization (dpf), before sex  
603 differentiation. Larval zebrafish were raised on 14/10 h light/dark cycle at 28 °C, at a maximum density  
604 of 20 in 10 mL E3h medium (5 mM NaCl, 0.17 mM KCl, 0.33 mM CaCl<sub>2</sub>, 0.33 mM MgSO<sub>4</sub>, 1.5 mM  
605 HEPES, pH 7.3). For dark-rearing at 3 hours post-fertilization embryos were sorted into 60 mm Petri  
606 dishes at a stocking density of 15 larva per 10 mL medium and placed into a dark box till 5 dpf. At 5  
607 dpf the media was replaced and larvae maintained under normal light cycles till testing at 6 dpf. For  
608 controls, siblings were raised in parallel under the same conditions except with exposure to normal  
609 14/10 light cycles.

610

611 Transgenic lines used were enhancer traps *y279-Gal4* and *y375-Gal4* (Marquart et al., 2015),  
612 *Tg(UAS:epNTR-tagRFP)y268* (Tabor et al., 2014), *Tg(UAS:Kaede)s1999t* (Davison et al., 2007),  
613 *Tg(atox7:GFP)rw021* (Masai et al., 2003), *Tg(otpb.A:Gal4-myl7:GFP)zc67* (Fujimoto et al., 2011) and  
614 *TgBAC(vglut2a[slc17a6b]:loxP-mCherry-loxP-Gal4ff)nns21* (Satou et al., 2013). Mutant lines:  
615 *otpa<sup>m866</sup>* (Fernandes et al., 2012). *moe<sup>b476</sup>* and *mib<sup>ta52b</sup>* were kind gifts of Ajay Chitnis (Jensen et al.,  
616 2001; Schier et al., 1996). Gal4 lines are available from the Zebrafish International Resource Center  
617 (<http://zebrafish.org>).

618

619 *Behavior tracking and analysis*

620

621 Behavioral tests were performed on 6 and 7 dpf larvae except as noted. Infrared illumination  
622 (CMVision Supplies, 850 nm) was used to monitor larvae with camera lenses fitted with IR-longpass  
623 filters to exclude visible light. Visible illumination ( $40 \mu\text{W}/\text{cm}^2$  measured using a radiometer  
624 (International Light Technologies)), was provided by white LEDs positioned over the recording  
625 chamber (Thorlabs). Testing areas were maintained at 26-28°C and larvae were adapted to the  
626 recording environment for 30 min prior to starting experiments. We used DAQtimer event control  
627 software to coordinate illumination conditions and recordings (Yokogawa et al., 2012). When  
628 experiments required confocal brain imaging and behavioral analysis, larvae were raised in medium  
629 containing 200  $\mu\text{M}$  PTU starting at 1 dpf. PTU was removed at least 24 h prior to behavioral  
630 recordings.

631

632 *Trajectory Analysis:* Path trajectory recordings were performed and analyzed as previously described  
633 (Horstick et al., 2017): images were captured with a uEye IDS1545LE-M CMOS camera (1<sup>st</sup> Vision)  
634 and larvae tracked in real-time using DAQtimer. Individual larvae were placed into a 120 x 120 mm  
635 arena. Each individual was tracked for 30 s after loss of illumination over 4 successive trials separated  
636 by 3 min baseline illumination (with the same protocol used for constant illumination trials except the  
637 light remained on throughout). Where behavioral experiments were coupled with manipulations  
638 (chemogenetic or laser ablation, genetic mutations) baseline controls were obtained by recording the  
639 30s illuminated interval prior to the light off interval except as otherwise noted. We used three  
640 measures to characterize directional bias in path trajectories: net turn angle (NTA), Absolute NTA and  
641 Match Index. **NTA:** the sum total of all leftward (- degrees) and rightward (+ degrees) path direction  
642 changes over a 30 s recording interval. Thus, individuals that changed direction equally to the left and  
643 right would have an NTA of 0, indicating no net directional preference. **Absolute NTA:** as for the NTA  
644 but taking the absolute value of each path direction change before summation. The absolute NTA



645 measures the total amount of turning behavior during a 30 s interval. **Match Index:** Used for  
646 experiments where larvae were subjected to four trials, the Match Index is the fraction of trials 2-4  
647 where the NTA had the same sign as on the first trial. We excluded trials where we obtained less than  
648 10 s of data for an individual. A MI of 1.0 indicates that a larvae turned in the same direction on trials  
649 2-4, as on trial 1, whereas a MI of 0.33 would occur if only one of trials 2-4 were performed in the  
650 same direction as on trial 1.

651

652 *Kinematic analysis:* To measure routine turn initiation larvae were recorded using a high-speed camera  
653 (DRS Lightning RDT/1; DEL Imaging) at 1000 Hz with off-line analysis of video images using Flote  
654 (Harold A Burgess and Granato, 2007). Larvae were tested in a 58 x 58 mm arena with IR illumination  
655 and recordings were triggered when larvae entered a centrally placed 15 x 15 mm ROI using DAQtimer  
656 software and a uEye camera. To minimize environmental visual cues that might influence trajectories,  
657 the arena was completely enclosed with a diffuser underneath the arena and a fitted lid above the arena  
658 holding a IR long-pass filter. As for trajectory analysis, we performed 4 recordings (10 s duration) after  
659 loss of illumination separated by 3 min of baseline illumination. Control experiments were the same,  
660 but without the dark periods. We analyzed only larvae that executed at least 3 routine turns on each of  
661 the 4 trials.

662

663 *Startle direction assay:* Acoustic startle tests were performed as previously described (Harold A.  
664 Burgess and Granato, 2007). To determine if startle direction bias correlated with dark-circling  
665 direction bias, larvae were classified as left/right at 6 dpf using trajectory analysis over 4 trials. At 7 dpf  
666 larvae were placed into a 3 x 3 grid of 1 x 1 cm wells. For trials in the dark, larvae were tested with 16  
667 repeats of an auditory/vibrational stimulus ( $\sim 18$ dB relative to  $1 \text{ m/s}^2$ ), occurring 10 s after loss of  
668 illumination. Each repeat was separated by 2 min constant illumination. Trials in the light were the

669 same, without the 10 s dark period. Only larvae performing at least 4 long or short latency startle  
670 responses were analyzed. For analysis we compared the percentage of short and long latency C-starts  
671 performed in a rightward direction for each pre-classified group of larvae.

672

673 *Two-target phototaxis assay:* For the two-target phototaxis assay, we first identified the left/right  
674 identity of larvae at 6 dpf using trajectory analysis over 4 dark trials. Larvae with consistent directional  
675 responses to all 4 trials were then retained for testing the next day. At 7 dpf, these larvae were  
676 individually placed into a 58 x 58 mm arena and given 5 min to adapt to baseline illumination (20  
677  $\mu\text{W}/\text{cm}^2$ ). After adaption a 15 x 15 mm ROI at the center of the arena was monitored by DAQtimer.  
678 Once the larva entered the ROI, full field illumination was extinguished and real-time tracking of the  
679 position and orientation of the larva was started. After 3 seconds, two equal intensity light spots (20  
680  $\mu\text{W}/\text{cm}^2$ , 6 mm radius) were positioned 10 mm from the head of the larva at  $55^\circ$  from its current  
681 orientation. Light spots were projected onto the base of the arena (AAXA P2 Pico Projector). At the  
682 same time, a high-speed camera was triggered to capture the response of the larva to the phototaxis  
683 stimuli. Each larva was tested four times with 5 min constant illumination between trials. Trials were  
684 excluded from analysis if a phototaxis target was obscured by the environment perimeter or mis-  
685 positioned due to sudden movement of the larva, and only larvae with at least 2 trials were analyzed.

686

687 *Multi-day bias persistence tests:* (1) For testing individual motor asymmetry over 24 h we first  
688 classified individuals as left or right biased at 6 dpf using kinematic routine turn analysis as described  
689 above. Classification was determined using the directional preference on the first trial only. Larvae  
690 were individually housed and returned to the incubator overnight. We then re-tested larvae at 7 dpf,  
691 using the same assay. (2) To determine if motor asymmetry persisted over longer timelines, larvae were  
692 tested at 6 dpf using path trajectory analysis over 4 dark trials. Individuals performing same-direction

693 circling for all 4 trials were then individually housed, and starting at 7 dpf fed daily (AP100  
694 larvae dry food, Zeigler) with the media partially replaced 3 hours after each feeding. No food was  
695 given on the day of testing. At 10 dpf larvae were retested using the same assay.

696

697 *Heritability analysis:* We selectively raised larvae classified as left or right-biased over two  
698 generations. In each generation parents were incrossed and larvae were tested using kinematic analysis  
699 (four repeated trials). To enrich for individuals with consistent motor asymmetry, we raised only larvae  
700 that (1) had a percentage rightward turn use in the top or bottom quartile of responses and (2)  
701 performed all four trials in the same direction. For each generation, left/right classified adults were  
702 incrossed as groups and a minimum of 3 independent clutches combined for analysis.

703

704 *Calcium imaging*

705

706 We co-injected 50 ng of *UAS:nls-GCaMP6s* construct (derived from a previously published plasmid  
707 *UAS:nls-GCaMP6s-2a-nls-dsRed* (Tabor et al., 2018)) with 80 ng toll RNA into one cell stage  
708 *y279:Gal4* embryos, and raised in medium containing 200  $\mu$ M PTU. At 6 dpf larvae were mounted in  
709 2% low melting temp agarose and imaged using a 20x immersion objective on an upright Leica TCS-  
710 SP5II microscope. To avoid visual stimulation during GCaMP imaging we used a 2-photon Spectra-  
711 Physics MaiTai DeepSee laser tuned to 950 nm and installed a 620 nm LED (All Electronics) on the  
712 stage to provide visual stimulation at 80  $\mu$ W/cm<sup>2</sup>. We performed three trials per larva separated by 3  
713 minutes of constant red light illumination, with each trial consisting of 60 s light, 60 s dark, 60 s light.  
714 We captured a single plane through the PT using 16x line averaging of GCaMP fluorescence at  
715 approximately 0.96 Hz. After imaging, larvae were recovered from the agarose and placed in fresh E3h  
716 media overnight. At 7 dpf we used trajectory analysis of dark-induced circling to determine left/right

717 identity. We analyzed fluorescence intensity changes by manually outlining an ROI around each neuron  
718 in a maximum projection of the time series data, and calculated  $(F_t - F_0)/F_b$  ( $\Delta F/F$ ) where  $F_0$  was the  
719 mean fluorescence intensity during the first baseline period. Neurons with a  $\Delta F/F$  greater than 3S over  
720 three successive timepoints were classified as responders, where S was the standard deviation of  $\Delta F/F$   
721 during the first baseline period.

722

### 723 *Ablations*

724

725 *Genetic ablations:* Nitroreductase ablations were performed as previously described (Horstick et al.,  
726 2016). To maximize ablation efficiency Gal4 lines were crossed to *UAS:epNTR-tagRFP* and RFP (+)  
727 embryos were raised to maturity. Carriers were in-crossed and embryos were sorted using  
728 epifluorescence at 2-3 dpf into NTR (+) red fluorescence or NTR (-) groups. Each group was treated  
729 with 7.5 mM metronidazole in E3h media from 3 to 5 dpf. Metronidazole media was refreshed after 24  
730 h. At 5 dpf larvae were returned to fresh E3h media and allowed to recover overnight. At 6 dpf  
731 genetically ablated larvae were tested and a subset imaged on a confocal microscope to validate  
732 ablation efficacy.

733

734 *Laser ablations:* We immobilized *y279:Gal4;UAS:Kaede* larvae with tricaine, and performed laser  
735 ablation using a Spectra-Physics MaiTai DeepSee laser (tuned to 800 nm, beam power 2 W) on an  
736 upright Leica TCS-SP5II microscope with a 20x immersion objective. For ablation we set the ROI to 1-  
737 2 neurons per field of view. Efficient ablation was accompanied by the acute and transient development  
738 of a bubble. Larvae were then removed from agar and returned to fresh E3h. Controls were  
739 anesthetized and mounted for the same duration as ablated larvae. We performed path trajectory  
740 analysis during four dark-induced circling trials per larva. For bilaterally ablated larvae, we classified

741 left/right identity using the first trial, then calculated the mean net turn angle for trials 2-4. For  
742 unilaterally ablated larvae, where we aimed to see if ablation imposed a pattern of lateralized behavior,  
743 we took the mean net turn angle for all four trials. After behavioral analysis we imaged the ablated  
744 region to assess ablation efficiency and analyzed only larvae with near complete absence of targeted  
745 neurons (~50% of ablated individuals).

746

#### 747 *Genetic mapping*

748

749 To map the *moe*<sup>v606</sup> mutation, we formed mutant and sibling pools, each consisting of 75 embryos that  
750 were derived from a single clutch. We Trizol-extracted total mRNA, purified on a Qiagen RNA mini-  
751 cleanup column and sequenced samples using single end 100 bp reads using an Illumina HiSeq (100 M  
752 reads per sample). We then used RNAmapper in Galaxy (galaxyproject.org) to perform bulk segregant  
753 analysis, identifying a critical region on chromosome 9 and a 7.7-fold reduction in expression of  
754 *epb41l5* within that interval. We noted that no reads were present in exon 1 or 2 of *epb41l5*; these  
755 exons amplified correctly from sibling genomic DNA but not from mutant DNA (exon 1 primers: 5'-  
756 TCCACTTTTGGGGATTACG, 5'-ATTCAATGGCGGAGCAATAC; exon 2 primers: 5'-  
757 GGCCATTGACAGTAGTGTGG, 5'-TGACAAGACGCTGAACAAGC) suggesting the presence of a  
758 deletion. We then used PCR to assess the presence of genomic DNA in mutants in intervals across a 20  
759 kbp candidate region from between exon 3 of *epb41l5* to the 3'UTR of the neighboring gene *ptpn4a*.  
760 This narrowed the candidate region to 7 kb allowing us to design primers to amplify and sequence  
761 across the deletion, revealing loss of genomic DNA in mutants between bases chr9:213682 to 218117  
762 (GRCz11, chr9\_KZ114909v1\_alt). In complementation testing with *moe*<sup>b476</sup>, we recovered the curly-up  
763 phenotype in 50/192 (26%) embryos, confirming that this was the causative mutation. Sequencing of  
764 the PCR product that spanned the deletion enabled us to design a genotyping protocol to distinguish

765 wildtype and heterozygous larvae using 3 primers (5'-CTACCTGAACAACTCAATCCAGTC, 5'-  
766 AACCATATAAAATGAGCGTCTCT and 5'-TCATTTTGAAATGCCTGCAA). These primers  
767 amplify a single 296 bp band from the wildtype locus, and a 333 bp band from embryos with the  
768 deletion.

769

770 Previous work established the presence of a large deletion in *moe*<sup>b476</sup> but did not define its precise  
771 boundaries, precluding genotyping of heterozygotes (Jensen et al., 2001). To map the *moe*<sup>b476</sup> deletion  
772 we used whole-genome shotgun sequencing with 100 bp paired-end reads. After mapping reads to  
773 GRCz11 with bowtie2, we focused on a large read-depleted region on chr9 covering *epb4115*.  
774 IGVviewer revealed 5 reads where the paired end reads spanned the read-depleted region. PCR across  
775 the putative deletion using primers 5-AAACTGCATAAGTGCCTCACC and 5-  
776 GAGACATCGATTCCGCTTTG amplified a ~600 bp band. Sequencing of this band produced the  
777 expected genomic sequence at each end and demonstrated that the deletion in *moe*<sup>b476</sup> spans  
778 chr9:28835868 to 29370835, completely deleting *epb4115*, *ptpn4a*, *tmem177* and *pth2r*, and exons from  
779 *zgc:91818* and *hs6st3b*. We then used these PCR primers to genotype *moe*<sup>b476</sup> outcrosses because only  
780 heterozygous larvae yielded the 600 bp band.

781

782 *Genotyping*: After behavioral analysis we genotyped *moe*<sup>y606</sup> and *moe*<sup>b476</sup> larvae as described above.  
783 *mib*<sup>ta52b</sup> larvae were genotyped by PCR amplification across the mutation (primers: 5'  
784 GGTGTGTCTGGATCGTCTGAAGAAC ; 5' GATGGATGTGGTAACTGATGACTC, product size  
785 194 bp). To discriminate wildtype from heterozygous larvae PCR products were digested with the  
786 restriction enzyme NlaIII (New England Biolabs) which digests wildtype but not mutant sequence (WT  
787 155 bp ; Het 155, 194 bp ; Mutant 194 bp). For experiments with *otpa* mutants, we compared the  
788 'cousin' offspring of wildtype (+/+) and mutant (-/-) sibling parents.

789

790 *Photoconversion*

791

792 We characterized projections from *y279-Gal4, UAS:Kaede* expressing rostral PT neurons by focal  
793 photoconversion of Kaede from green to red fluorescence in one PT hemisphere. At 2 dpf PT neurons  
794 constitute a salient bilateral cluster in the ventral diencephalon. To photoconvert Kaede, larvae were  
795 mounted in 2% low melting temperature agarose on an upright Leica TCS SP5 II confocal microscope.  
796 We used a 25x immersion objective and set the field of view to comprise 1-2 Kaede expressing PT  
797 neurons, imaged with a 488 nm laser. For photoconversion, we performed a single scan of the field of  
798 view with 8 frame averaging using a 405 nm laser at 5% power. Conversion of Kaede to the red  
799 fluorescent state was confirmed by imaging with a 568 nm laser. After photoconversion embryos were  
800 removed from agarose and maintained in E3h until 5 or 6 dpf for imaging the PT and projections to the  
801 habenula.

802

803 *Neuron Counts*

804

805 We counted *y279:Gal4, UAS:Kaede* expressing neurons in the rostral PT in larvae imaged at 6 dpf on  
806 an upright Leica TCS SP5 II confocal using the 488 nm laser, a 25x immersion objective and 3x zoom.  
807 Images were imported into Imaris for counting. After imaging, larvae were extracted from the agar,  
808 individually maintained in 6 well plates for 24 h, then tested at 7 dpf to determine left/right identity  
809 using path trajectory analysis of dark-induced circling behavior.

810

811 *Statistical analysis*

812

813 Analysis was performed in IDL (Harris), RStudio (Mathworks) and Gnumeric  
814 (<http://projects.gnome.org/gnumeric/>). Data in figures and text are means  $\pm$  SEM except where  
815 otherwise noted. All t-tests were 2-sided. N reported in figure legends. Box plots show median and  
816 quartiles with whiskers indicating 10-90%. Normality was determined by the Shapiro-Francia test.  
817 Analysis of non-normal data sets was performed using the Mann-Whitney U-test or for one-sample  
818 comparisons to a given number, through Monte Carlo testing (see below).

819

820 To analyze whether distributions of turn direction deviated from that which would be expected if larvae  
821 did not show direction bias, we used Monte Carlo simulations rather than comparison to a binomial  
822 distribution because the direction of sequential turns are not independent (Chen and Engert, 2014;  
823 Horstick et al., 2017). In each simulation, we used the same number of larvae as in the experimental  
824 data (i.e., 89 and 39 respectively for light-off and baseline conditions), and the same number of routine-  
825 turns produced on each of the four trials for each larva. As sequential routine-turns show a statistically  
826 significant likelihood to be executed in the same direction we simulated routine-turn direction across  
827 events on a given trial by randomly selecting a turn-direction for the first event, then then using the  
828 previously measured 'lock index' to weight a random decision on whether each subsequent turn would  
829 be in the same or reverse direction. We used lock indices of 62.8 and 13.2 for light-off and baseline  
830 simulations respectively (corresponding to 81.4% and 56.6% chance of executing sequential same-  
831 direction routine-turns)(Horstick et al., 2017). The expected histograms of %rightward turns in Figure 1  
832 are derived from 10,000 simulations. In the simulation data, 10% of larvae showed less than 23% right-  
833 ward turns or greater than 76% right-ward turns during light-off conditions (i.e., a modal value of 9 of  
834 the 89 larvae), whereas in our data, 37 of the 89 larvae exceeded these thresholds. This proportion was  
835 greater than all 10,000 simulations, hence we assign a p-value of  $< 0.0001$ . In comparison, under  
836 baseline conditions, simulations 10% of larvae showed less than 31% rightward turns or greater than



837 68% right-ward turns during light-off conditions, and in our data 7 of the 39 larvae exceeded these  
838 thresholds. However, this proportion was exceeded by 1195 simulations, hence we assign a p-value  
839 0.119. We used a similar procedure to compare the means of larval Match Indices to 0.5, by ranking the  
840 difference between the mean of actual match indices in experimental data, with means derived from  
841 100,000 simulations using the same number of larvae and trials per larvae under the null hypothesis  
842 assumption that larvae had a 50% (i.e. random) probability of matching the trial 1 direction on each of  
843 trials 2-4.

844

#### 845 *Data and Software Availability*

846

847 Further information and requests for image datasets and analysis software should be directed to Harold  
848 Burgess ([burgessha@mail.nih.gov](mailto:burgessha@mail.nih.gov)) or Eric Horstick ([eric.horstick@nih.gov](mailto:eric.horstick@nih.gov))

849

850

#### 851 **References**

852

Aizawa H, Bianco IH, Hamaoka T, Miyashita T, Uemura O, Concha ML, Russell C, Wilson SW,

Okamoto H. 2005. Laterotopic representation of left-right information onto the dorso-ventral axis of a zebrafish midbrain target nucleus. *Curr Biol* **15**:238–243.

doi:10.1016/j.cub.2005.01.014

Aizawa H, Goto M, Sato T, Okamoto H. 2007. Temporally regulated asymmetric neurogenesis causes left-right difference in the zebrafish habenular structures. *Dev Cell* **12**:87–98.

doi:10.1016/j.devcel.2006.10.004

- Amo R, Aizawa H, Takahoko M, Kobayashi M, Takahashi R, Aoki T, Okamoto H. 2010. Identification of the zebrafish ventral habenula as a homolog of the mammalian lateral habenula. *J Neurosci* **30**:1566–74. doi:10.1523/JNEUROSCI.3690-09.2010
- Amo R, Fredes F, Kinoshita M, Aoki R, Aizawa H, Agetsuma M, Aoki T, Shiraki T, Kakinuma H, Matsuda M, Yamazaki M, Takahoko M, Tsuboi T, Higashijima S, Miyasaka N, Koide T, Yabuki Y, Yoshihara Y, Fukai T, Okamoto H. 2014. The habenulo-raphe serotonergic circuit encodes an aversive expectation value essential for adaptive active avoidance of danger. *Neuron* **84**:1034–1048. doi:10.1016/j.neuron.2014.10.035
- Andrew RJ, Dharmaretnam M, Gyori B, Miklosi A, Watkins JA, Sovrano VA. 2009. Precise endogenous control of involvement of right and left visual structures in assessment by zebrafish. *Behavioural brain research* **196**:99–105.
- Annett M. 1972. The distribution of manual asymmetry. *Br J Psychol* **63**:343–358.
- Armour JAL, Davison A, McManus IC. 2014. Genome-wide association study of handedness excludes simple genetic models. *Heredity (Edinb)* **112**:221–225. doi:10.1038/hdy.2013.93
- Barth KA, Miklosi A, Watkins J, Bianco IH, Wilson SW, Andrew RJ. 2005. fsi zebrafish show concordant reversal of laterality of viscera, neuroanatomy, and a subset of behavioral responses. *Curr Biol* **15**:844–50.
- Brandler WM, Morris AP, Evans DM, Scerri TS, Kemp JP, Timpson NJ, St Pourcain B, Smith GD, Ring SM, Stein J, Monaco AP, Talcott JB, Fisher SE, Webber C, Paracchini S. 2013. Common variants in left/right asymmetry genes and pathways are associated with relative hand skill. *PLoS Genet* **9**:e1003751. doi:10.1371/journal.pgen.1003751
- Buchanan SM, Kain JS, de Bivort BL. 2015. Neuronal control of locomotor handedness in *Drosophila*. *Proc Natl Acad Sci U S A* **112**:6700–6705. doi:10.1073/pnas.1500804112

- Burgess Harold A, Granato M. 2007. Modulation of locomotor activity in larval zebrafish during light adaptation. *Journal of Experimental Biology* **210**:2526–39.
- Burgess Harold A., Granato M. 2007. Sensorimotor gating in larval zebrafish. *J Neurosci* **27**:4984–4994. doi:10.1523/JNEUROSCI.0615-07.2007
- Burgess HA, Schoch H, Granato M. 2010. Distinct retinal pathways drive spatial orientation behaviors in zebrafish navigation. *Current Biology* **20**:381–386.
- Chen X, Engert F. 2014. Navigational strategies underlying phototaxis in larval zebrafish. *Front Syst Neurosci* **8**:39. doi:10.3389/fnsys.2014.00039
- Cheng R-K, Krishnan S, Lin Q, Kibat C, Jesuthasan S. 2017. Characterization of a thalamic nucleus mediating habenula responses to changes in ambient illumination. *BMC Biol* **15**:104. doi:10.1186/s12915-017-0431-1
- Chou M-Y, Amo R, Kinoshita M, Cherng B-W, Shimazaki H, Agetsuma M, Shiraki T, Aoki T, Takahoko M, Yamazaki M, Higashijima S, Okamoto H. 2016. Social conflict resolution regulated by two dorsal habenular subregions in zebrafish. *Science* **352**:87–90. doi:10.1126/science.aac9508
- Collins RL. 1969. On the inheritance of handedness. II. Selection for sinistrality in mice. *J Hered* **60**:117–119.
- Concha ML, Burdine RD, Russell C, Schier AF, Wilson SW. 2000. A nodal signaling pathway regulates the laterality of neuroanatomical asymmetries in the zebrafish forebrain. *Neuron* **28**:399–409.
- Corballis MC. 2003. From mouth to hand: gesture, speech, and the evolution of right-handedness. *Behav Brain Sci* **26**:199–208; discussion 208-260.
- Davison A, Frennd HT, Moray C, Wheatley H, Searle LJ, Eichhorn MP. 2009. Mating behaviour in *Lymnaea stagnalis* pond snails is a maternally inherited, lateralized trait. *Biol Lett* **5**:20–22. doi:10.1098/rsbl.2008.0528

- Davison JM, Akitake CM, Goll MG, Rhee JM, Gosse N, Baier H, Halpern ME, Leach SD, Parsons MJ. 2007. Transactivation from Gal4-VP16 transgenic insertions for tissue-specific cell labeling and ablation in zebrafish. *Developmental Biology* **304**:811–824.
- Dean DJ, Orr JM, Newberry RE, Mittal VA. 2016. Motor behavior reflects reduced hemispheric asymmetry in the psychosis risk period. *Schizophr Res* **170**:137–142.  
doi:10.1016/j.schres.2015.10.017
- Dreosti E, Vendrell Llopis N, Carl M, Yaksi E, Wilson SW. 2014. Left-right asymmetry is required for the habenulae to respond to both visual and olfactory stimuli. *Curr Biol* **24**:440–445.  
doi:10.1016/j.cub.2014.01.016
- Duboue ER, Hong E, Eldred KC, Halpern ME. 2017. Left Habenular Activity Attenuates Fear Responses in Larval Zebrafish. *Curr Biol* **27**:2154-2162.e3. doi:10.1016/j.cub.2017.06.017
- Eriksson N, Macpherson JM, Tung JY, Hon LS, Naughton B, Saxonov S, Avey L, Wojcicki A, Pe'er I, Mountain J. 2010. Web-based, participant-driven studies yield novel genetic associations for common traits. *PLoS Genet* **6**:e1000993. doi:10.1371/journal.pgen.1000993
- Facchin L, Burgess HA, Siddiqi M, Granato M, Halpern ME. 2009. Determining the function of zebrafish epithalamic asymmetry. *Philosophical transactions of the Royal Society of London* **364**:1021–32.
- Facchin L, Duboue ER, Halpern ME. 2015. Disruption of Epithalamic Left-Right Asymmetry Increases Anxiety in Zebrafish. *J Neurosci* **35**:15847–15859. doi:10.1523/JNEUROSCI.2593-15.2015
- Fernandes AM, Fero K, Arrenberg AB, Bergeron SA, Driever W, Burgess HA. 2012. Deep Brain Photoreceptors Control Light-Seeking Behavior in Zebrafish Larvae. *Current Biology* **22**:2042–7. doi:10.1016/j.cub.2012.08.016

- Fujimoto E, Stevenson TJ, Chien CB, Bonkowsky JL. 2011. Identification of a dopaminergic enhancer indicates complexity in vertebrate dopamine neuron phenotype specification. *Dev Biol* **352**:393–404. doi:10.1016/j.ydbio.2011.01.023
- Gamse JT, Kuan YS, Macurak M, Brosamle C, Thisse B, Thisse C, Halpern ME. 2005. Directional asymmetry of the zebrafish epithalamus guides dorsoventral innervation of the midbrain target. *Development (Cambridge, England)* **132**:4869–81.
- Gamse JT, Thisse C, Thisse B, Halpern ME. 2003. The parapineal mediates left-right asymmetry in the zebrafish diencephalon. *Development* **130**:1059–1068.
- Good CD, Johnsrude I, Ashburner J, Henson RN, Friston KJ, Frackowiak RS. 2001. Cerebral asymmetry and the effects of sex and handedness on brain structure: a voxel-based morphometric analysis of 465 normal adult human brains. *Neuroimage* **14**:685–700. doi:10.1006/nimg.2001.0857
- Guadalupe T, Willems RM, Zwiers MP, Arias Vasquez A, Hoogman M, Hagoort P, Fernandez G, Buitelaar J, Franke B, Fisher SE, Francks C. 2014. Differences in cerebral cortical anatomy of left- and right-handers. *Front Psychol* **5**:261. doi:10.3389/fpsyg.2014.00261
- Gutierrez-Ibanez C, Reddon AR, Kreuzer MB, Wylie DR, Hurd PL. 2011. Variation in asymmetry of the habenular nucleus correlates with behavioural asymmetry in a cichlid fish. *Behav Brain Res* **221**:189–196. doi:10.1016/j.bbr.2011.03.001
- Hendricks M, Jesuthasan S. 2007. Asymmetric innervation of the habenula in zebrafish. *J Comp Neurol* **502**:611–619. doi:10.1002/cne.21339
- Hepper PG, McCartney GR, Shannon EA. 1998. Lateralised behaviour in first trimester human foetuses. *Neuropsychologia* **36**:531–534. doi:10.1016/S0028-3932(97)00156-5

- Horstick EJ, Bayleyen Y, Sinclair JL, Burgess HA. 2017. Search strategy is regulated by somatostatin signaling and deep brain photoreceptors in zebrafish. *BMC Biol* **15**:4. doi:10.1186/s12915-016-0346-2
- Horstick EJ, Jordan DC, Bergeron SA, Tabor KM, Serpe M, Feldman B, Burgess HA. 2014. Increased functional protein expression using nucleotide sequence features enriched in highly expressed genes in zebrafish **43**:e48. doi:10.1093/nar/gkv035
- Itoh M, Kim C-H, Palardy G, Oda T, Jiang Y-J, Maust D, Yeo S-Y, Lorick K, Wright GJ, Ariza-McNaughton L, Weissman AM, Lewis J, Chandrasekharappa SC, Chitnis AB. 2003. Mind bomb is a ubiquitin ligase that is essential for efficient activation of Notch signaling by Delta. *Dev Cell* **4**:67–82.
- Jensen AM, Walker C, Westerfield M. 2001. mosaic eyes: a zebrafish gene required in pigmented epithelium for apical localization of retinal cell division and lamination. *Development* **128**:95–105.
- Jozet-Alves C, Romagny S, Bellanger C, Dickel L. 2012. Cerebral correlates of visual lateralization in *Sepia*. *Behav Brain Res* **234**:20–25. doi:10.1016/j.bbr.2012.05.042
- Kokel D, Bryan J, Laggner C, White R, Cheung CY, Mateus R, Healey D, Kim S, Werdich AA, Haggarty SJ, Macrae CA, Shoichet B, Peterson RT. 2010. Rapid behavior-based identification of neuroactive small molecules in the zebrafish. *Nature chemical biology* **6**:231–237.
- Koshiba M, Kikuchi T, Yohda M, Nakamura S. 2002. Inversion of the anatomical lateralization of chick thalamofugal visual pathway by light experience. *Neurosci Lett* **318**:113–116.
- Krebs LT, Iwai N, Nonaka S, Welsh IC, Lan Y, Jiang R, Saijoh Y, O'Brien TP, Hamada H, Gridley T. 2003. Notch signaling regulates left-right asymmetry determination by inducing Nodal expression. *Genes Dev* **17**:1207–1212. doi:10.1101/gad.1084703

Krishnan S, Mathuru AS, Kibat C, Rahman M, Lupton CE, Stewart J, Claridge-Chang A, Yen S-C, Jesuthasan S. 2014. The right dorsal habenula limits attraction to an odor in zebrafish. *Curr Biol* **24**:1167–1175. doi:10.1016/j.cub.2014.03.073

Lee HJ, Schneider RF, Manousaki T, Kang JH, Lein E, Franchini P, Meyer A. 2017. Lateralized Feeding Behavior is Associated with Asymmetrical Neuroanatomy and Lateralized Gene Expressions in the Brain in Scale-Eating Cichlid Fish. *Genome Biol Evol* **9**:3122–3136. doi:10.1093/gbe/evx218

Lee JD, Migeotte I, Anderson KV. 2010. Left-right patterning in the mouse requires Epb4.115-dependent morphogenesis of the node and midline. *Dev Biol* **346**:237–246. doi:10.1016/j.ydbio.2010.07.029

Lopes SS, Lourenço R, Pacheco L, Moreno N, Kreiling J, Saúde L. 2010. Notch signalling regulates left-right asymmetry through ciliary length control. *Development* **137**:3625–3632. doi:10.1242/dev.054452

Lupton C, Sengupta M, Cheng R-K, Chia J, Thirumalai V, Jesuthasan S. 2017. Loss of the Habenula Intrinsic Neuromodulator Kisspeptin1 Affects Learning in Larval Zebrafish. *eNeuro* **4**. doi:10.1523/ENEURO.0326-16.2017

Markou P, Ahtam B, Papadatou-Pastou M. 2017. Elevated Levels of Atypical Handedness in Autism: Meta-Analyses. *Neuropsychol Rev* **27**:258–283. doi:10.1007/s11065-017-9354-4

Marquart GD, Tabor KM, Brown M, Strykowski JL, Varshney GK, LaFave MC, Mueller T, Burgess SM, Higashijima S-I, Burgess HA. 2015. A 3D Searchable Database of Transgenic Zebrafish Gal4 and Cre Lines for Functional Neuroanatomy Studies. *Front Neural Circuits* **9**:78. doi:10.3389/fncir.2015.00078

Masai I, Lele Z, Yamaguchi M, Komori A, Nakata A, Nishiwaki Y, Wada H, Tanaka H, Nojima Y, Hammerschmidt M, Wilson SW, Okamoto H. 2003. N-cadherin mediates retinal lamination,

maintenance of forebrain compartments and patterning of retinal neurites. *Development*

**130**:2479–2494. doi:10.1242/dev.00465

Matsuda M, Rand K, Palardy G, Shimizu N, Ikeda H, Dalle Nogare D, Itoh M, Chitnis AB. 2016.

Epb4115 competes with Delta as a substrate for Mib1 to coordinate specification and

differentiation of neurons. *Development* **143**:3085–3096. doi:10.1242/dev.138743

McManus IC. 1985. Handedness, language dominance and aphasia: a genetic model. *Psychol Med*

*Monogr Suppl* **8**:1–40.

Medland SE, Duffy DL, Wright MJ, Geffen GM, Martin NG. 2006. Handedness in twins: joint analysis

of data from 35 samples. *Twin Res Hum Genet* **9**:46–53. doi:10.1375/183242706776402885

Miller AC, Obholzer ND, Shah AN, Megason SG, Moens CB. 2013. RNA-seq-based mapping and

candidate identification of mutations from forward genetic screens. *Genome Res* **23**:679–686.

doi:10.1101/gr.147322.112

Mueller T. 2012. What is the Thalamus in Zebrafish? *Front Neurosci* **6**:64.

doi:10.3389/fnins.2012.00064

Mueller T, Wullimann MF. 2005. Atlas of Early Zebrafish Brain Development. A Tool for Molecular

Neurogenetics., 1st ed. Amsterdam: Elsevier B.V.

Ocklenburg S, Schmitz J, Moinfar Z, Moser D, Klose R, Lor S, Kunz G, Tegenthoff M, Faustmann P,

Francks C, Epplen JT, Kumsta R, Güntürkün O. 2017. Epigenetic regulation of lateralized fetal

spinal gene expression underlies hemispheric asymmetries. *eLife* **6**:e22784.

doi:10.7554/eLife.22784

Ohata S, Aoki R, Kinoshita S, Yamaguchi M, Tsuruoka-Kinoshita S, Tanaka H, Wada H, Watabe S,

Tsuboi T, Masai I, Okamoto H. 2011. Dual roles of Notch in regulation of apically restricted

mitosis and apicobasal polarity of neuroepithelial cells. *Neuron* **69**:215–230.

doi:10.1016/j.neuron.2010.12.026



- Pascual A, Huang K-L, Neveu J, Pr at T. 2004. Brain asymmetry and long-term memory. *Nature* **427**:605. doi:10.1038/427605a
- Pierce-Shimomura JT, Faumont S, Gaston MR, Pearson BJ, Lockery SR. 2001. The homeobox gene *lim-6* is required for distinct chemosensory representations in *C. elegans*. *Nature* **410**:694–698. doi:10.1038/35070575
- Pisharath H, Rhee JM, Swanson MA, Leach SD, Parsons MJ. 2007. Targeted ablation of beta cells in the embryonic zebrafish pancreas using *E. coli* nitroreductase. *Mechanisms of development* **124**:218–29.
- Puelles L, Rubenstein JLR. 2003. Forebrain gene expression domains and the evolving prosomeric model. *Trends in Neurosciences* **26**:469–476. doi:10.1016/S0166-2236(03)00234-0
- Randlett O, Wee CL, Naumann EA, Nnaemeka O, Schoppik D, Fitzgerald JE, Portugues R, Lacoste AM, Riegler C, Engert F. 2015. Whole-brain activity mapping onto a zebrafish brain atlas. *Nature Methods* **12**:1039–46.
- Raya A, Kawakami Y, Rodriguez-Esteban C, Buscher D, Koth CM, Itoh T, Morita M, Raya RM, Dubova I, Bessa JG, de la Pompa JL, Izpisua Belmonte JC. 2003. Notch activity induces Nodal expression and mediates the establishment of left-right asymmetry in vertebrate embryos. *Genes Dev* **17**:1213–1218. doi:10.1101/gad.1084403
- Rink E, Guo S. 2004. The too few mutant selectively affects subgroups of monoaminergic neurons in the zebrafish forebrain. *Neuroscience* **127**:147–54.
- Roberson S, Halpern ME. 2018. Development and connectivity of the habenular nuclei. *Semin Cell Dev Biol* **78**:107–115. doi:10.1016/j.semcdb.2017.10.007
- Rogers LJ. 2009. Hand and paw preferences in relation to the lateralized brain. *Philos Trans R Soc Lond B Biol Sci* **364**:943–954. doi:10.1098/rstb.2008.0225

- Rogers LJ. 1990. Light input and the reversal of functional lateralization in the chicken brain. *Behavioural Brain Research* **38**:211–221. doi:10.1016/0166-4328(90)90176-F
- Rogers LJ. 1982. Light experience and asymmetry of brain function in chickens. *Nature* **297**:223. doi:10.1038/297223a0
- Satou C, Kimura Y, Hirata H, Suster ML, Kawakami K, Higashijima S. 2013. Transgenic tools to characterize neuronal properties of discrete populations of zebrafish neurons. *Development* **140**:3927–31. doi:10.1242/dev.099531
- Schier AF, Neuhauss SC, Harvey M, Malicki J, Solnica-Krezel L, Stainier DY, Zwartkruis F, Abdelilah S, Stemple DL, Rangini Z, Yang H, Driever W. 1996. Mutations affecting the development of the embryonic zebrafish brain. *Development* **123**:165–178.
- Somers M, Ophoff RA, Aukes MF, Cantor RM, Boks MP, Dauwan M, de Visser KL, Kahn RS, Sommer IE. 2015. Linkage analysis in a Dutch population isolate shows no major gene for left-handedness or atypical language lateralization. *J Neurosci* **35**:8730–8736. doi:10.1523/JNEUROSCI.3287-14.2015
- Sommer I, Ramsey N, Kahn R, Aleman A, Bouma A. 2001. Handedness, language lateralisation and anatomical asymmetry in schizophrenia: meta-analysis. *Br J Psychiatry* **178**:344–351.
- Sun ZY, Kloppel S, Riviere D, Perrot M, Frackowiak R, Siebner H, Mangin J-F. 2012. The effect of handedness on the shape of the central sulcus. *Neuroimage* **60**:332–339. doi:10.1016/j.neuroimage.2011.12.050
- Tabor KM, Bergeron SA, Horstick EJ, Jordan DC, Aho V, Porkka-Heiskanen T, Haspel G, Burgess HA. 2014. Direct activation of the Mauthner cell by electric field pulses drives ultra-rapid escape responses. *Journal of Neurophysiology* **112**:834–844. doi:10.1152/jn.00228.2014

- Tabor KM, Smith TS, Brown M, Bergeron SA, Briggman KL, Burgess HA. 2018. Presynaptic Inhibition Selectively Gates Auditory Transmission to the Brainstem Startle Circuit. *Curr Biol* **28**:2527-2535.e8. doi:10.1016/j.cub.2018.06.020
- Tay TL, Ronneberger O, Ryu S, Nitschke R, Driever W. 2011. Comprehensive catecholaminergic projectome analysis reveals single-neuron integration of zebrafish ascending and descending dopaminergic systems. *Nature communications* **2**:171.
- Trujillo-Paredes N, Valencia C, Guerrero-Flores G, Arzate D-M, Baizabal J-M, Guerra-Crespo M, Fuentes-Hernández A, Zea-Armenta I, Covarrubias L. 2016. Regulation of differentiation flux by Notch signalling influences the number of dopaminergic neurons in the adult brain. *Biol Open* **5**:336–347. doi:10.1242/bio.013383
- Vallortigara G, Rogers LJ. 2005. Survival with an asymmetrical brain: advantages and disadvantages of cerebral lateralization **28**:575.
- Vernier P, Wullimann MF. 2009. Evolution of the posterior tuberculum and preglomerular nuclear complex. *Encyclopedia of Neuroscience* 1404–1413.
- Webster WG. 1977. Territoriality and the evolution of brain asymmetry. *Ann N Y Acad Sci* **299**:213–221.
- Wes PD, Bargmann CI. 2001. *C. elegans* odour discrimination requires asymmetric diversity in olfactory neurons. *Nature* **410**:698. doi:10.1038/35070581
- Yan YT, Gritsman K, Ding J, Burdine RD, Corrales JD, Price SM, Talbot WS, Schier AF, Shen MM. 1999. Conserved requirement for EGF-CFC genes in vertebrate left-right axis formation. *Genes Dev* **13**:2527–2537.
- Yokogawa T, Hannan MC, Burgess HA. 2012. The dorsal raphe modulates sensory responsiveness during arousal in zebrafish. *The Journal of Neuroscience* **32**:15205–15215.

Zhang B-B, Yao Y-Y, Zhang H-F, Kawakami K, Du J-L. 2017. Left Habenula Mediates Light-Preference Behavior in Zebrafish via an Asymmetrical Visual Pathway. *Neuron* **93**:914-928.e4.

doi:10.1016/j.neuron.2017.01.011

853

854

855

856

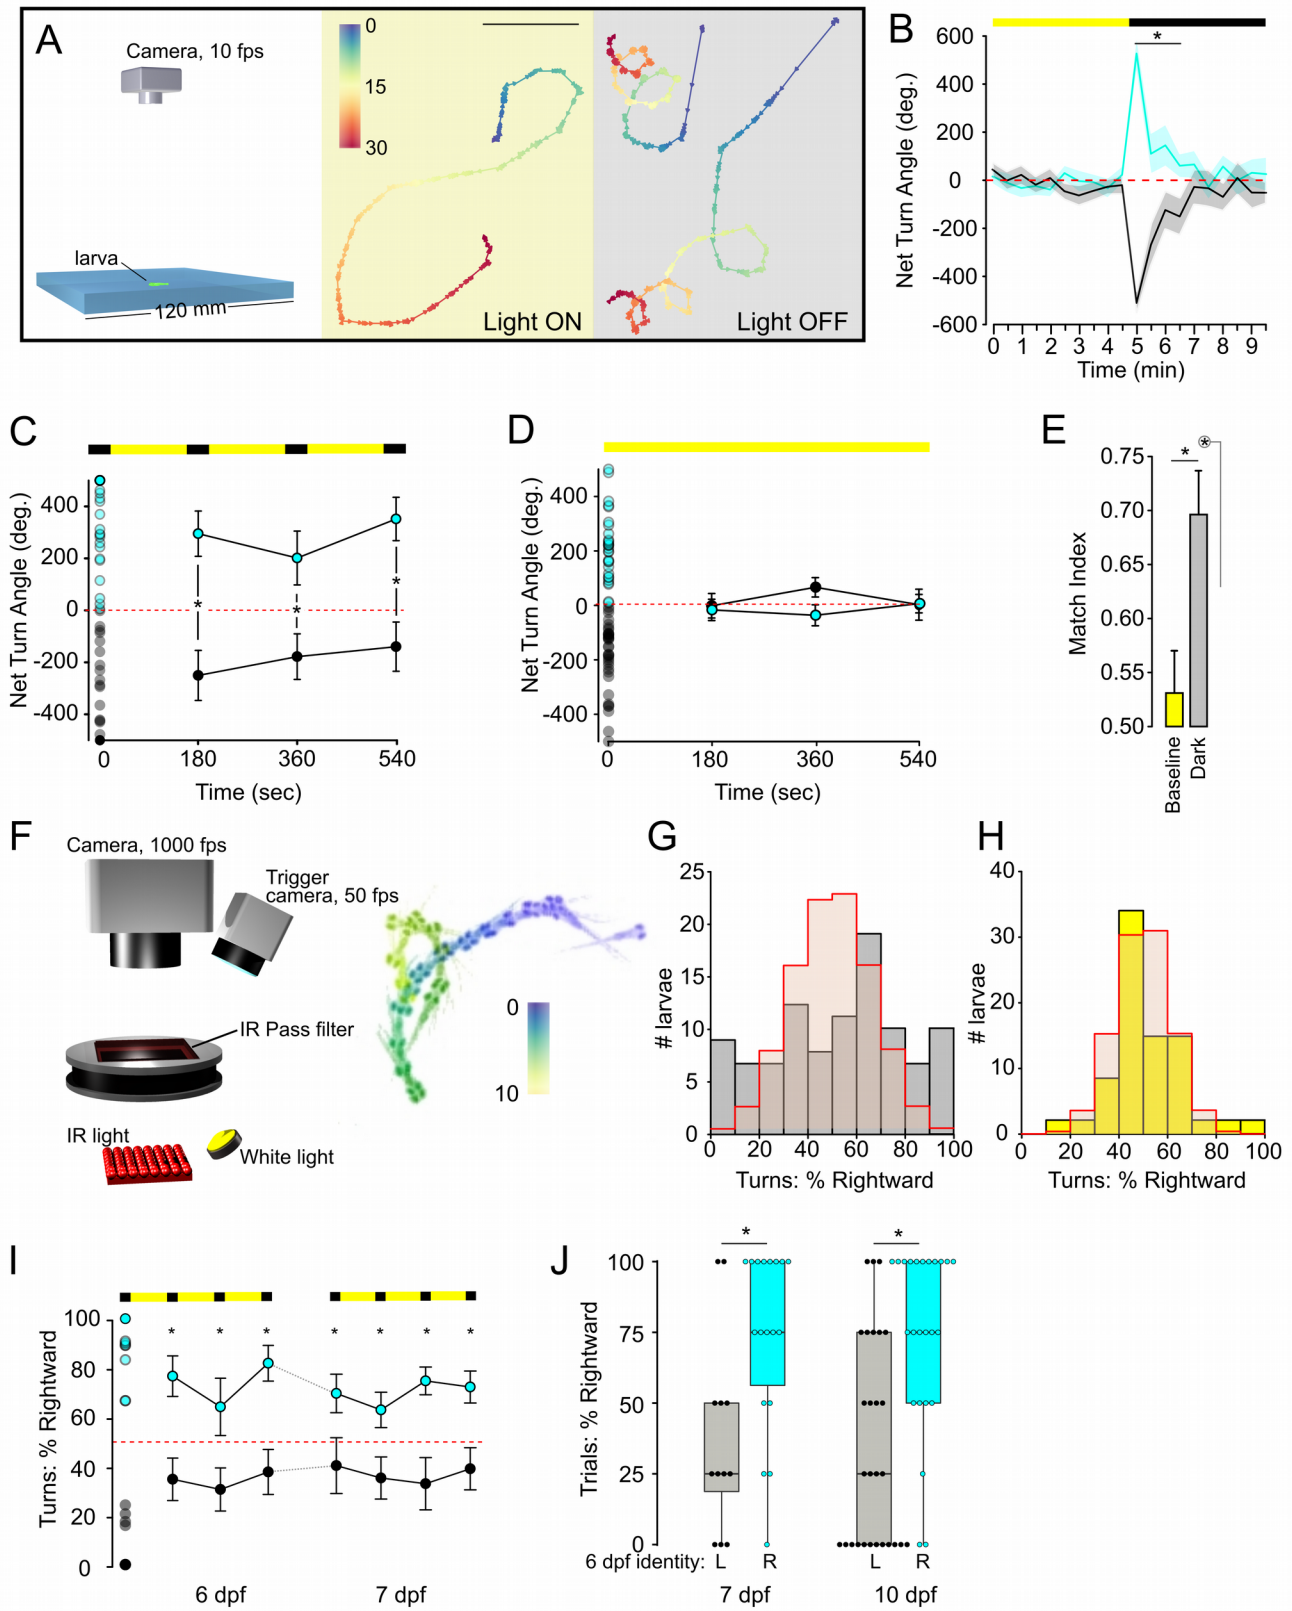

Figure 1

857

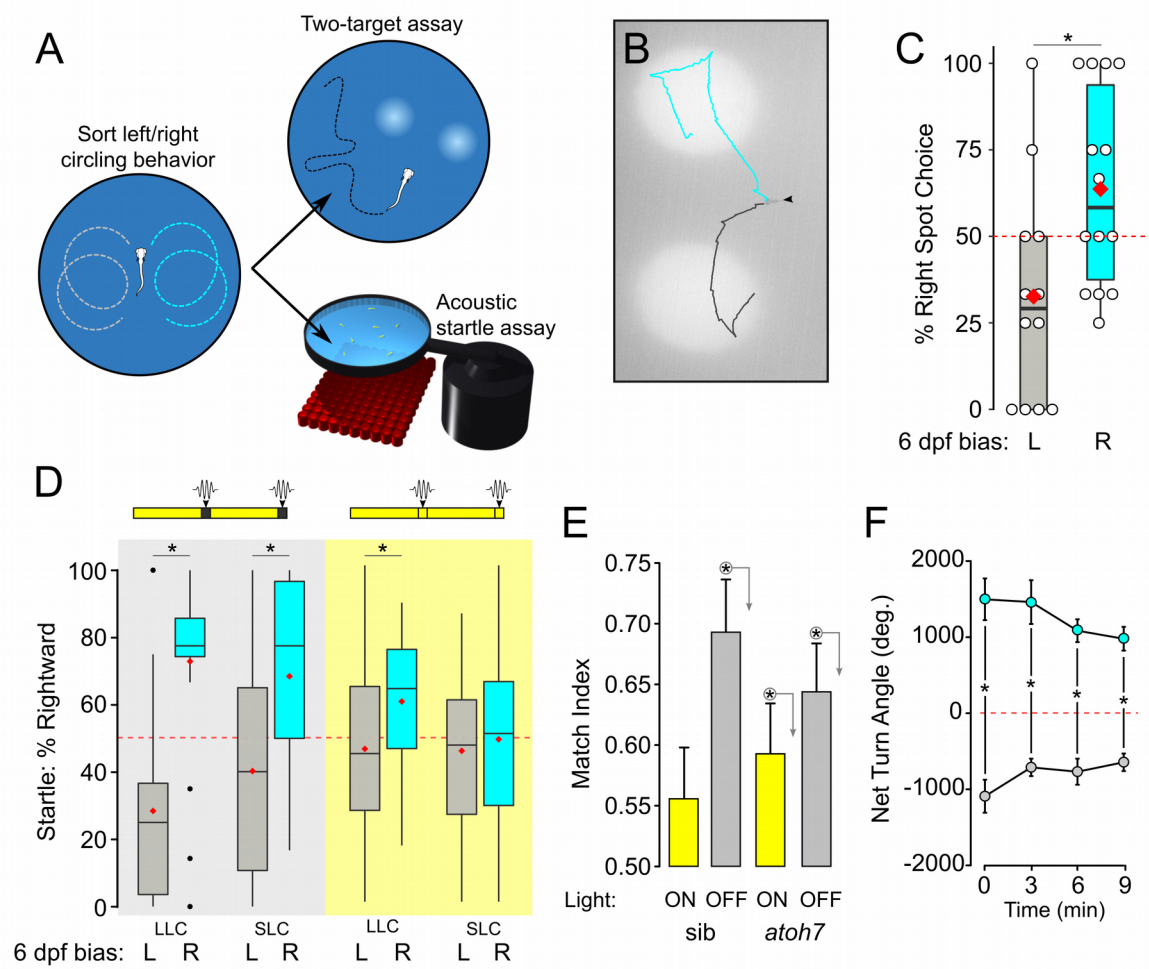

Figure 2

858

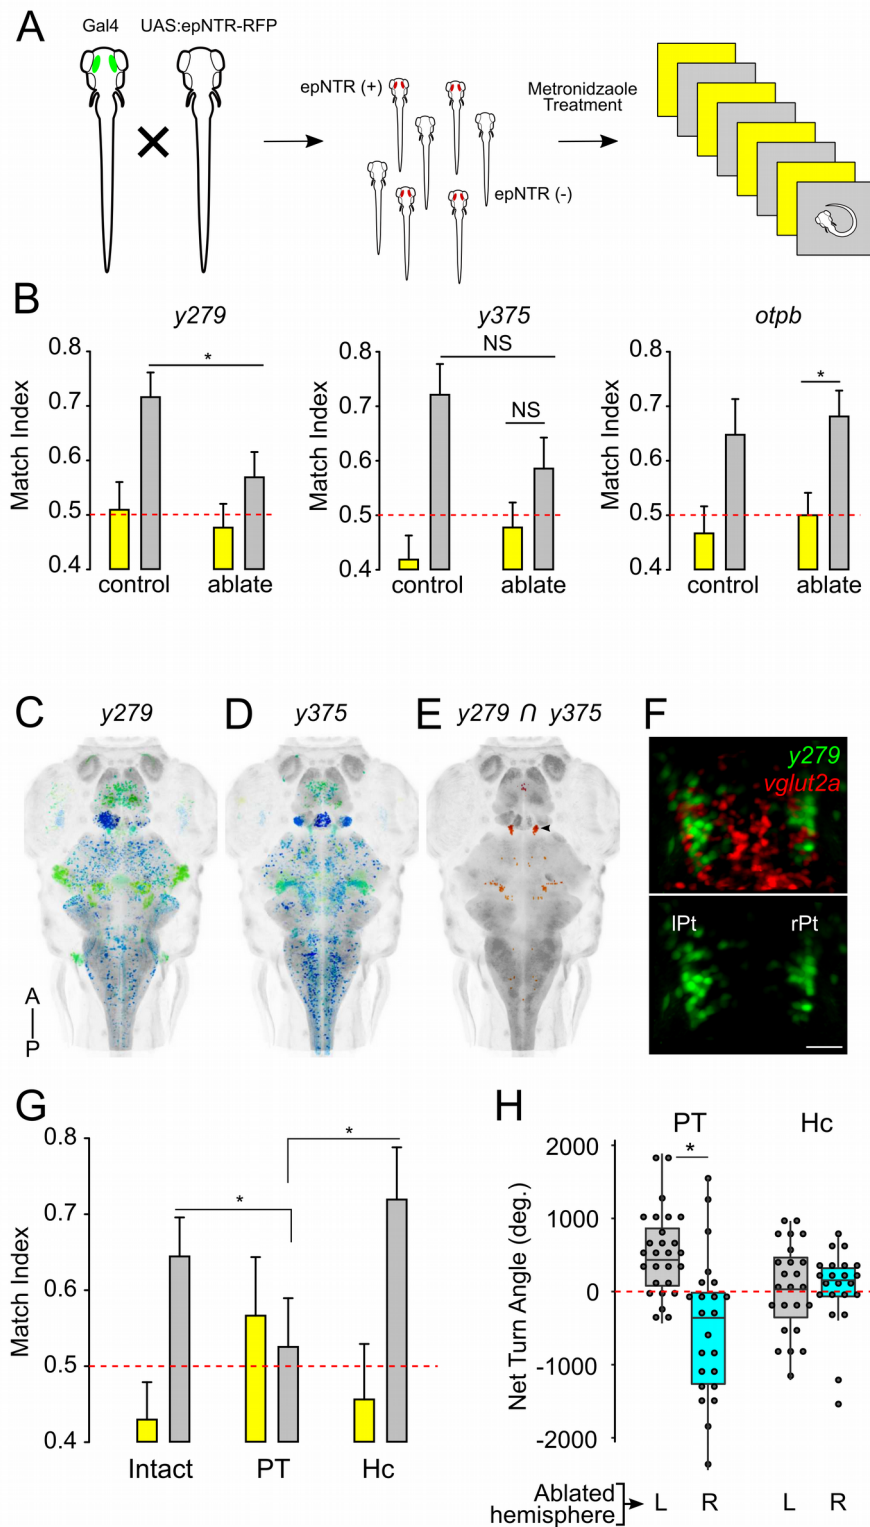

Figure 3



859

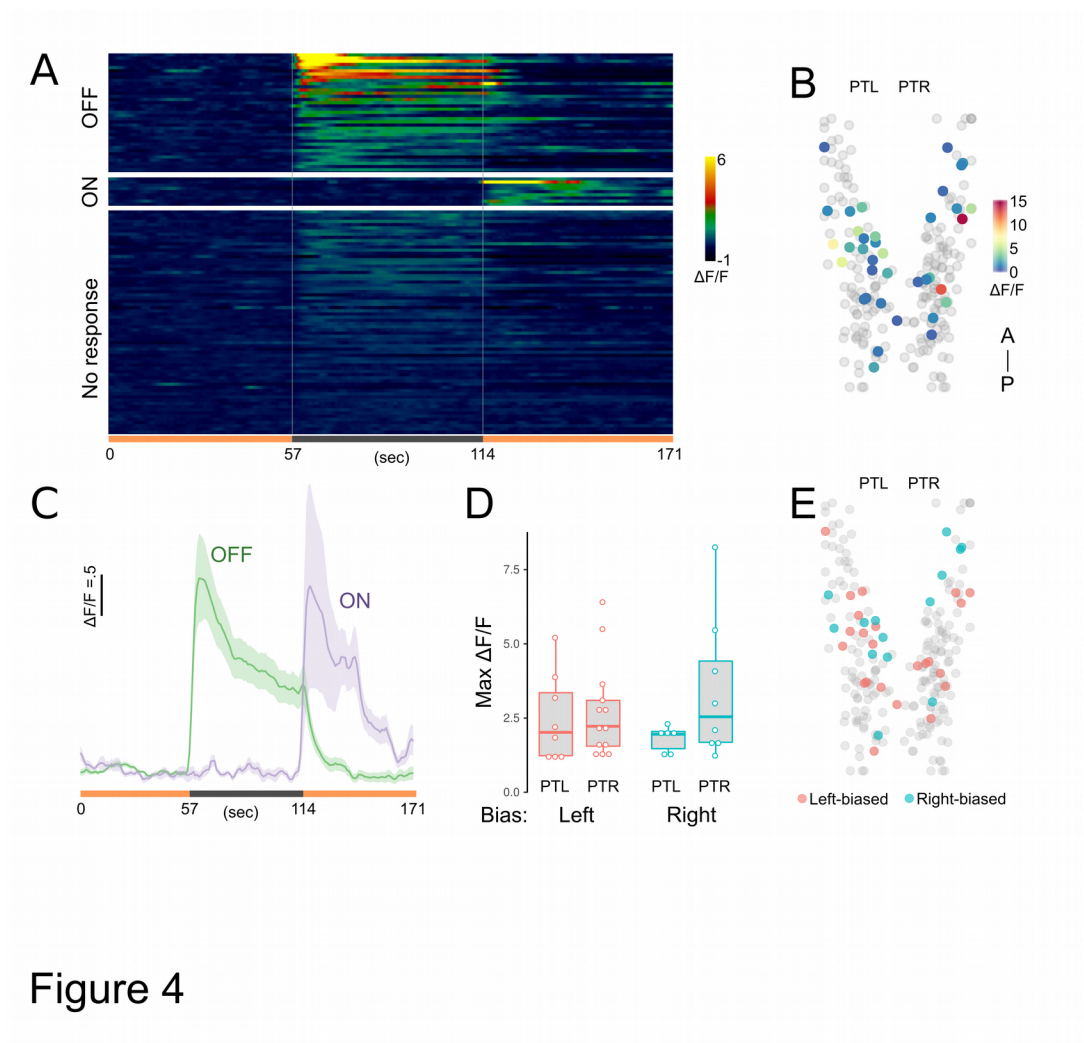

Figure 4



860

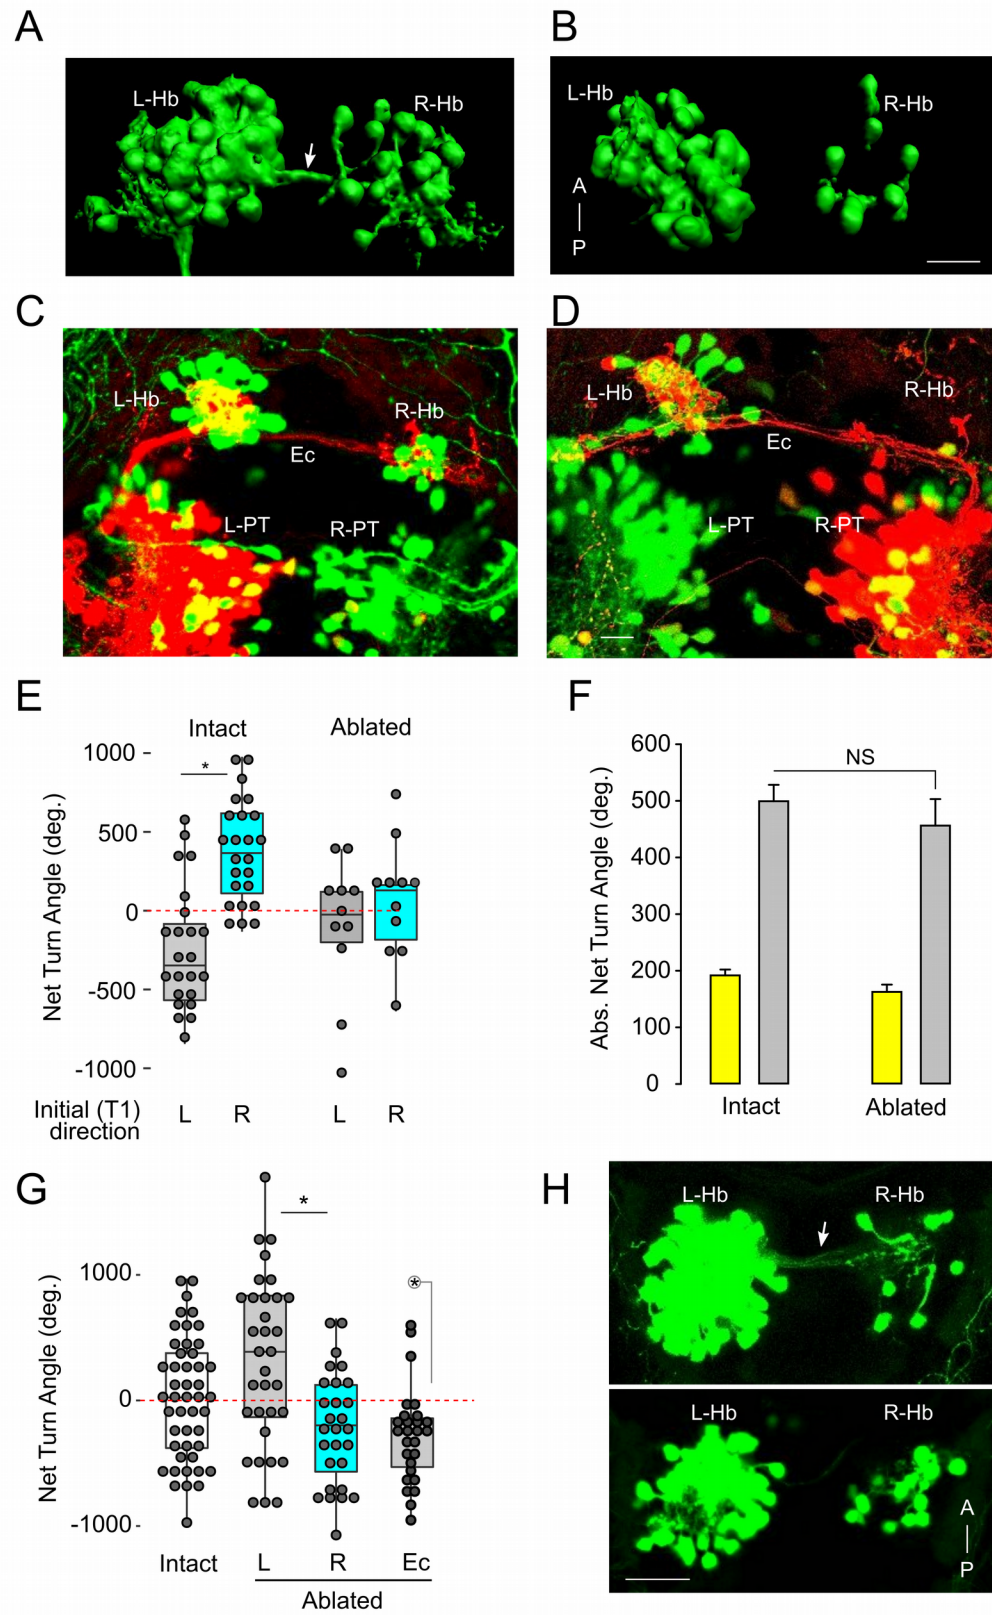

Figure 5

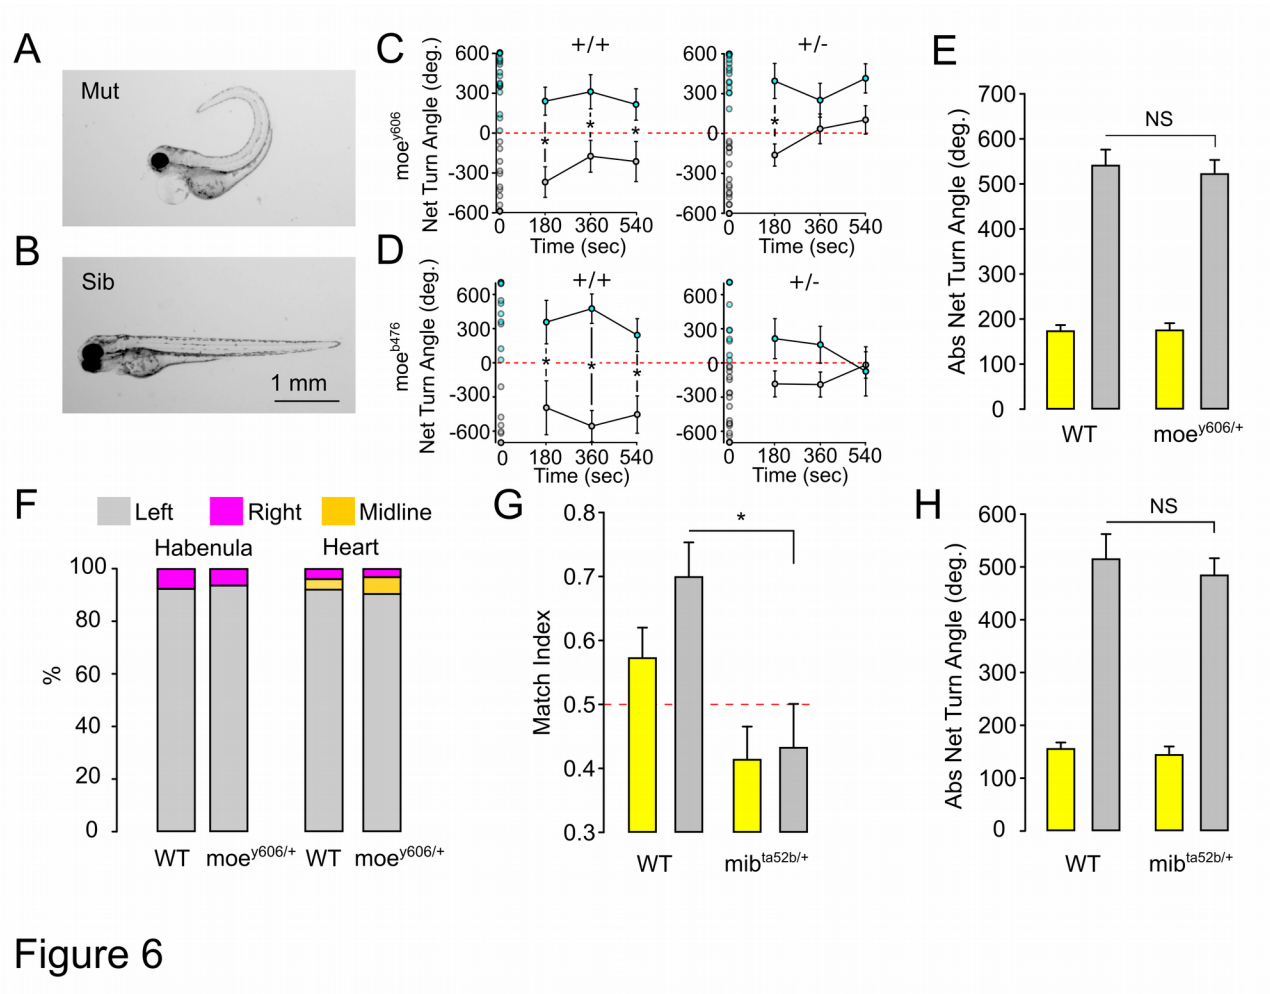

Figure 6

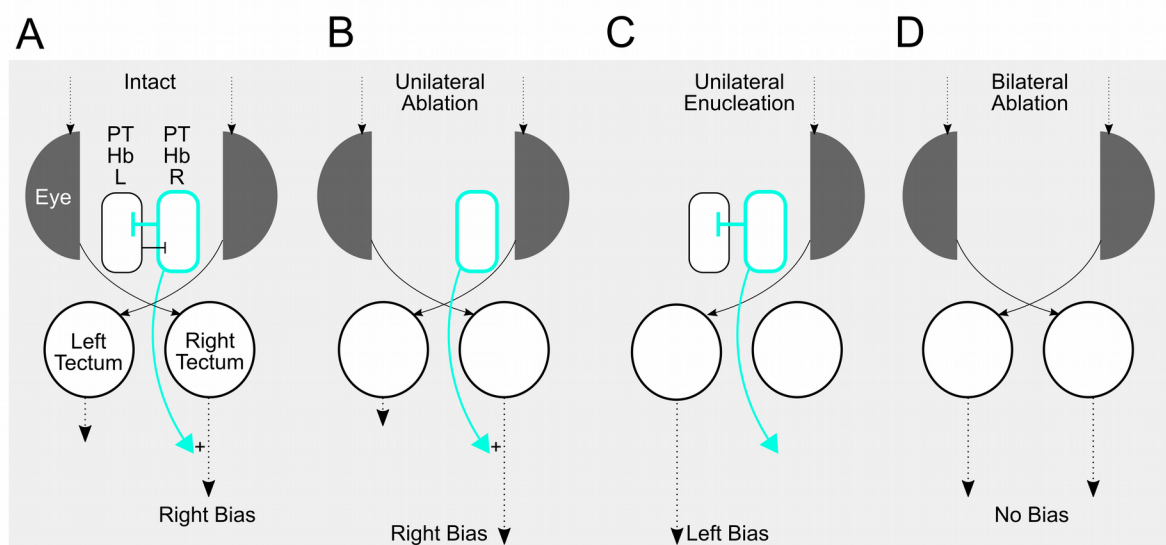

Figure 7
